# Supplementary material for: The Strength and Timing of the Mitochondrial Bottleneck in Salmon Suggests a Conserved Mechanism in Vertebrates
Source: PLoS One. 2011 May 31;6(5):e20522. doi: 10.1371/journal.pone.0020522 (PMC3105079; doi:10.1371/journal.pone.0020522)
Supplement: Text S2 — Mathematica notebook (Mathematica file). (NB) [file pone.0020522.s002.nb]

(************** Content-type: application/mathematica **************
                     CreatedBy='Mathematica 5.0'

                    Mathematica-Compatible Notebook

This notebook can be used with any Mathematica-compatible
application, such as Mathematica, MathReader or Publicon. The data
for the notebook starts with the line containing stars above.

To get the notebook into a Mathematica-compatible application, do
one of the following:

* Save the data starting with the line of stars above into a file
  with a name ending in .nb, then open the file inside the
  application;

* Copy the data starting with the line of stars above to the
  clipboard, then use the Paste menu command inside the application.

Data for notebooks contains only printable 7-bit ASCII and can be
sent directly in email or through ftp in text mode.  Newlines can be
CR, LF or CRLF (Unix, Macintosh or MS-DOS style).

NOTE: If you modify the data for this notebook not in a Mathematica-
compatible application, you must delete the line below containing
the word CacheID, otherwise Mathematica-compatible applications may
try to use invalid cache data.

For more information on notebooks and Mathematica-compatible 
applications, contact Wolfram Research:
  web: http://www.wolfram.com
  email: info@wolfram.com
  phone: +1-217-398-0700 (U.S.)

Notebook reader applications are available free of charge from 
Wolfram Research.
*******************************************************************)

(*CacheID: 232*)


(*NotebookFileLineBreakTest
NotebookFileLineBreakTest*)
(*NotebookOptionsPosition[    129665,       6094]*)
(*NotebookOutlinePosition[    130393,       6119]*)
(*  CellTagsIndexPosition[    130349,       6115]*)
(*WindowFrame->Normal*)


Notebook[{
Cell[TextData[{
  "Data analysis for the paper \"An Extensive Mitochondrial Bottleneck Occurs \
During Oogenesis in a Non-Mammalian Vertebrate\" by Jonci N Wolff, Daniel J\n\
White, Michael Woodhams, Helen E White and Neil J Gemmell.\n\nThe data \
analysis has been done in ",
  StyleBox["Mathematica",
    FontSlant->"Italic"],
  ". As this is an expensive commercial package, many will not have access to \
it or be familiar with it. I have assumed the reader is familiar with several \
computer programming languages, and I give additional explainations where \
such experience does not suffice to understand ",
  StyleBox["Mathematica",
    FontSlant->"Italic"],
  "'s syntax. (",
  StyleBox["Mathematica",
    FontSlant->"Italic"],
  " can be used like a procedural language, but it is more friendly to being \
used in functional and logical (e.g. Prolog) programming idioms.)\n\n\
Predefine some variables to avoid warning messages when variable names are \
similar:"
}], "Text"],

Cell[BoxData[{
    \(\(Off[General::spell, General::spell1];\)\), "\[IndentingNewLine]", 
    \(\({rawData, \ mData, meData, eData, fData, mfData, efData, normal, 
        norm, \[Sigma]PDFmData, \[Sigma]PDFeData, \[Sigma]PDFfData, \
\[Sigma]PDFmeData, \[Sigma]PDFmfData, \[Sigma]LogPDFmData, \
\[Sigma]LogPDFmeData, \[Sigma]LogPDFmfData, \[Sigma]LogPDFefData, \
\[Sigma]LogPDFeData, \[Sigma]LogPDFfData, \[Sigma]LogPDFtmData, \
\[Sigma]PDFtmData, \[Sigma]LogPDFtmeData, \[Sigma]PDFtmeData, \
\[Sigma]LogPDFtmfData, \[Sigma]PDFtmfData, tmData, mean, median, mode, var, 
        varM, varC, vard, nMin, nMax, grid, logInterp3Dtmef, logInterp3Dtme, 
        logInterp3Dtmf, interp1Dtmef, interp1Dtme, interp1Dtmf, 
        logInterp3Dme, interp1Dme, logInterp3Dmf, interp1Dmf, mean, meanM, 
        meanC, tmeData, tmfData, xMin, xMax, yMin, 
        yMax};\)\), "\[IndentingNewLine]", 
    \(\(On[General::spell, General::spell1];\)\)}], "Input"],

Cell["\<\
Turn off some numerical warnings which will otherwise be obtrusive:\
\>", "Text"],

Cell[BoxData[
    \(\(Off[NIntegrate::ncvb, NIntegrate::slwcon];\)\)], "Input"],

Cell["\<\
This is the raw data. Each individual has a list of its name followed by its \
heteroplasmy measurements in parts-per-thousand. Each family is a list of \
individual lists, with the mother coming first. The whole stricture is a list \
of families.\
\>", "Text"],

Cell[BoxData[
    \(\(rawData = {{{"\<m214\>", 634, 654, 637, 627, 632, 616, 630, 638, 645, 
              639, 616, 636, 630}, {"\<e1\>"}, {"\<e2\>"}, {"\<e3\>", 
              597}, {"\<e4\>", 630}, {"\<e5\>", 654}, {"\<e6\>", 
              597}, {"\<e7\>", 578, 611}, {"\<e8\>", 690}, {"\<e9\>", 
              500}, {"\<e10\>", 608, 597, 589}, {"\<e11\>", 574, 571, 
              578}, {"\<e12\>", 669, 637, 654}, {"\<e13\>", 667, 653, 
              636}, {"\<e14\>", 770, 758, 772}, {"\<e15\>", 638, 628, 
              605}, {"\<e16\>", 680, 648, 649}, {"\<e17\>", 627, 641, 
              625}, {"\<e18\>", 566, 564, 563}, {"\<e19\>", 638, 624, 
              616}, {"\<e20\>", 666, 664, 674}, {"\<e21\>", 651, 629, 
              615}, {"\<e22\>", 686, 660, 685}, {"\<e23\>", 686, 670, 
              656}, {"\<e24\>", 710, 679, 700}, {"\<e25\>", 656, 656, 
              640}, {"\<e26\>", 725, 704, 708}, {"\<e27\>", 621, 633, 
              631}, {"\<e28\>", 672, 653, 649}, {"\<e29\>", 647, 649, 
              633}, {"\<e30\>", 634, 612, 621}, {"\<f1 \>", 634, 654, 
              637}, {"\<f2 \>", 649}, {"\<f3 \>", 736}, {"\<f4 \>", 736, 744, 
              752}, {"\<f5 \>", 749}, {"\<f6 \>", 640}, {"\<f7 \>", 628, 635, 
              641}, {"\<f8 \>", 618}, {"\<f9 \>", 597}, {"\<f10 \>", 
              640}, {"\<f11\>", 606}, {"\<f12\>", 654, 668, 642}, {"\<f13\>", 
              600, 585, 576}, {"\<f14\>", 609, 610, 588}, {"\<f15\>", 690, 
              684, 690}, {"\<f16\>", 637, 641, 639}, {"\<f17\>", 
              717}, {"\<f18\>", 485}, {"\<f19\>", 692}, {"\<f20\>", 
              703}}, {{"\<m256\>", 330, 318, 326, 333, 339, 302, 338, 315, 
              316, 333, 308, 341, 310}, {"\<e1\>"}, {"\<e2\>", 
              374}, {"\<e3\>"}, {"\<e4\>"}, {"\<e5\>"}, {"\<e6\>"}, \
{"\<e7\>"}, {"\<e8\>", 357, 323}, {"\<e9\>", 329}, {"\<e10\>"}, {"\<e11\>", 
              332}, {"\<e12\>", 394}, {"\<e13\>", 337}, {"\<e14\>", 
              409}, {"\<e15\>", 434}, {"\<e16\>", 401}, {"\<e17\>", 
              395}, {"\<e18\>", 341}, {"\<e19\>", 358}, {"\<e20\>", 
              461}, {"\<e21\>", 274}, {"\<e22\>", 340}, {"\<e23\>", 
              363}, {"\<e24\>", 408}, {"\<e25\>", 397}, {"\<e26\>", 
              340}, {"\<e27\>", 395}, {"\<e28\>", 339}, {"\<e29\>", 
              383}, {"\<e30\>", 441}, {"\<f1 \>", 397, 399, 404}, {"\<f2 \>", 
              287}, {"\<f3 \>", 332}, {"\<f4 \>", 313, 297, 344}, {"\<f5 \>", 
              334}, {"\<f6 \>", 333}, {"\<f7 \>", 338}, {"\<f8 \>", 
              311}, {"\<f9 \>", 329, 344, 327}, {"\<f10 \>", 
              413}, {"\<f11\>", 430}, {"\<f12\>", 353}, {"\<f13\>", 
              445}, {"\<f14\>", 340}, {"\<f15\>", 355}, {"\<f16\>", 
              362}, {"\<f17\>", 428}, {"\<f18\>", 368}, {"\<f19\>", 
              351}, {"\<f20\>", 403}}, {{"\<m263\>", 672, 670, 678, 668, 672, 
              695, 679, 679, 669, 683, 676, 676, 681}, {"\<e1\>", 
              591}, {"\<e2\>", 696}, {"\<e3\>"}, {"\<e4\>"}, {"\<e5\>", 
              630}, {"\<e6\>"}, {"\<e7\>"}, {"\<e8\>"}, {"\<e9\>"}, \
{"\<e10\>"}, {"\<e11\>", 699}, {"\<e12\>", 675}, {"\<e13\>", 
              664}, {"\<e14\>", 716}, {"\<e15\>", 659}, {"\<e16\>", 
              643}, {"\<e17\>", 675}, {"\<e18\>", 736}, {"\<e19\>", 
              726}, {"\<e20\>", 
              676}, {"\<e21\>"}, {"\<e22\>"}, {"\<e23\>"}, {"\<e24\>"}, \
{"\<e25\>"}, {"\<e26\>"}, {"\<e27\>"}, {"\<e28\>"}, {"\<e29\>"}, {"\<e30\>"}, \
{"\<f1 \>", 765}, {"\<f2 \>", 698, 697, 700}, {"\<f3 \>", 648}, {"\<f4 \>", 
              695}, {"\<f5 \>", 669}, {"\<f6 \>", 729}, {"\<f7 \>", 652, 637, 
              658}, {"\<f8 \>", 694}, {"\<f9 \>", 642}, {"\<f10 \>", 708, 
              681, 702}, {"\<f11\>", 731}, {"\<f12\>", 720}, {"\<f13\>", 
              660}, {"\<f14\>", 724}, {"\<f15\>", 712}, {"\<f16\>", 
              763}, {"\<f17\>", 658}, {"\<f18\>", 722}, {"\<f19\>", 
              685}, {"\<f20\>", 714}}, {{"\<m272\>", 246, 237, 259, 200, 199, 
              194, 196, 210, 179, 156, 192, 169}, {"\<e1\>", 323}, {"\<e2\>", 
              283, 253, 255}, {"\<e3\>", 222}, {"\<e4\>", 228}, {"\<e5\>", 
              236}, {"\<e6\>", 199}, {"\<e7\>", 273, 258, 240}, {"\<e8\>", 
              155}, {"\<e9\>", 182}, {"\<e10\>", 197, 147, 171}, {"\<e11\>", 
              239}, {"\<e12\>", 150}, {"\<e13\>", 151}, {"\<e14\>", 
              203}, {"\<e15\>", 228}, {"\<e16\>", 175}, {"\<e17\>", 
              208}, {"\<e18\>", 236}, {"\<e19\>", 183}, {"\<e20\>", 
              169}, {"\<e21\>"}, {"\<e22\>"}, {"\<e23\>"}, {"\<e24\>"}, \
{"\<e25\>"}, {"\<e26\>"}, {"\<e27\>"}, {"\<e28\>"}, {"\<e29\>"}, {"\<e30\>"}, \
{"\<f1 \>", 246, 237, 259}, {"\<f2 \>", 276}, {"\<f3 \>", 273}, {"\<f4 \>", 
              226, 220, 234}, {"\<f5 \>", 190}, {"\<f6 \>", 152}, {"\<f7 \>", 
              181, 188, 189}, {"\<f8 \>", 243}, {"\<f9 \>", 
              173}, {"\<f10 \>", 254}, {"\<f11\>", 154}, {"\<f12\>", 
              166}, {"\<f13\>", 144}, {"\<f14\>", 149}, {"\<f15\>", 
              180}, {"\<f16\>", 242}, {"\<f17\>", 152}, {"\<f18\>", 
              201}, {"\<f19\>", 212}, {"\<f20\>", 139}}, {{"\<m357\>", 303, 
              316, 292, 254, 298, 268, 283, 294, 243, 256}, {"\<e1\>", 
              300}, {"\<e2\>", 263}, {"\<e3\>", 343}, {"\<e4\>"}, {"\<e5\>", 
              340, 314, 345}, {"\<e6\>"}, {"\<e7\>", 284}, {"\<e8\>", 325, 
              259, 239}, {"\<e9\>"}, {"\<e10\>", 236}, {"\<e11\>", 
              254}, {"\<e12\>", 277}, {"\<e13\>", 343}, {"\<e14\>", 
              153}, {"\<e15\>", 240}, {"\<e16\>", 211}, {"\<e17\>", 
              216}, {"\<e18\>", 224}, {"\<e19\>", 310}, {"\<e20\>", 
              214}, {"\<e21\>"}, {"\<e22\>"}, {"\<e23\>"}, {"\<e24\>"}, \
{"\<e25\>"}, {"\<e26\>"}, {"\<e27\>"}, {"\<e28\>"}, {"\<e29\>"}, {"\<e30\>"}, \
{"\<f1 \>", 248, 279, 278}, {"\<f2 \>", 408}, {"\<f3 \>", 278}, {"\<f4 \>", 
              288, 269, 278}, {"\<f5 \>", 310}, {"\<f6 \>", 334}, {"\<f7 \>", 
              275}, {"\<f8 \>", 369}, {"\<f9 \>", 330, 296, 
              303}, {"\<f10 \>", 267}, {"\<f11\>", 339}, {"\<f12\>", 
              294}, {"\<f13\>", 288}, {"\<f14\>", 270}, {"\<f15\>", 
              294}, {"\<f16\>", 347}, {"\<f17\>", 359}, {"\<f18\>", 
              357}, {"\<f19\>", 278}, {"\<f20\>", 389}}};\)\)], "Input"],

Cell["\<\
Now we strip of the names to leave just numbers in 'data',  convert \
parts-per-thousand to a fraction, and make some subsets: mData is mothers \
only, eData eggs only, fData fry only, meData mothers and eggs, mfData \
mothers and fry.\
\>", "Text"],

Cell[BoxData[{
    \(\(data\  = \ 
        Map[Rest, rawData, {2}]/1000. ;\)\), "\[IndentingNewLine]", 
    \(\(mData\  = \ 
        data\[LeftDoubleBracket]
          All, {1}\[RightDoubleBracket];\)\), "\[IndentingNewLine]", 
    \(\(eData\  = \ 
        data\[LeftDoubleBracket]All, 
          Range[2, 31]\[RightDoubleBracket];\)\), "\[IndentingNewLine]", 
    \(\(fData\  = \ 
        data\[LeftDoubleBracket]All, 
          Range[32, 51]\[RightDoubleBracket];\)\), "\[IndentingNewLine]", 
    \(\(meData\  = \ 
        data\[LeftDoubleBracket]All, 
          Range[31]\[RightDoubleBracket];\)\), "\[IndentingNewLine]", 
    \(\(mfData\  = \ 
        data\[LeftDoubleBracket]All, 
          Join[{1}, Range[32, 51]]\[RightDoubleBracket];\)\)}], "Input"],

Cell["For example, here's the data for family 1, mother and eggs:", "Text"],

Cell[CellGroupData[{

Cell[BoxData[
    \(meData\[LeftDoubleBracket]1\[RightDoubleBracket]\)], "Input"],

Cell[BoxData[
    \({{0.634`, 0.654`, 0.637`, 0.627`, 0.632`, 0.616`, 0.63`, 0.638`, 
        0.645`, 0.639`, 0.616`, 0.636`, 
        0.63`}, {}, {}, {0.597`}, {0.63`}, {0.654`}, {0.597`}, {0.578`, 
        0.611`}, {0.6900000000000001`}, {0.5`}, {0.608`, 0.597`, 
        0.589`}, {0.5740000000000001`, 0.5710000000000001`, 0.578`}, {0.669`, 
        0.637`, 0.654`}, {0.667`, 0.653`, 0.636`}, {0.77`, 0.758`, 
        0.772`}, {0.638`, 0.628`, 0.605`}, {0.68`, 0.648`, 0.649`}, {0.627`, 
        0.641`, 0.625`}, {0.5660000000000001`, 0.5640000000000001`, 
        0.5630000000000001`}, {0.638`, 0.624`, 0.616`}, {0.666`, 0.664`, 
        0.674`}, {0.651`, 0.629`, 0.615`}, {0.686`, 0.66`, 0.685`}, {0.686`, 
        0.67`, 0.656`}, {0.71`, 0.679`, 0.7000000000000001`}, {0.656`, 
        0.656`, 0.64`}, {0.725`, 0.704`, 0.708`}, {0.621`, 0.633`, 
        0.631`}, {0.672`, 0.653`, 0.649`}, {0.647`, 0.649`, 0.633`}, {0.634`, 
        0.612`, 0.621`}}\)], "Output"]
}, Open  ]],

Cell["This is the Gaussian/Normal distribution function", "Text"],

Cell[BoxData[
    \(\(normal[x_, \[Mu]_, var_] := 
        1/\((\ Sqrt[var\ 2\ Pi])\)*
          Exp[\(-\((x - \[Mu])\)^2\)/\((2  var)\)];\)\)], "Input"],

Cell["\<\
Now calculate the likelihood of a given measurement error. It is possible to \
do the following analytically, but just throwing numerical integrations at \
the problem is simpler to understand.\
\>", "Text"],

Cell["\<\
'likelihood\[Mu]\[Sigma]' is the likelihood of the data (a list of numbers) \
for the given \[Mu] and \[Sigma]. (We apply the 'normal' function to each \
element of 'data', then multiply the results.\
\>", "Text"],

Cell[BoxData[
    \(\(likelihood\[Mu]\[Sigma][\[Mu]_, \[Sigma]_, data_List] := 
        Times\  @@ \ Map[normal[#, \[Mu], \[Sigma]^2] &, data];\)\)], "Input"],

Cell["\<\
This function finds the log likelihood for a value of \[Sigma] given a list \
of measurements from a single individual. We eliminate \[Mu] by integrating \
over it. (In principle we integrate from -\[Infinity] to +\[Infinity], but I \
omit the range where the function is known to be very small.)\
\>", "Text"],

Cell[BoxData[
    \(\(logLikelihood\[Sigma]1[\[Sigma]_, data_List] := 
        If[Length[data] < 2, 0, 
          Log[NIntegrate[
              likelihood\[Mu]\[Sigma][\[Mu], \[Sigma], data], {\[Mu], 
                Min[data] - 5*\[Sigma], 
                Max[data] + 5*\[Sigma]}]]];\)\)], "Input"],

Cell["\<\
Now 'array' is a list of lists (data from a single family), and each list \
(data from an individual) has the same measurement error \[Sigma] but they \
all have different unknown means. The log likelihood of \[Sigma] is just sum \
of the log likelihoods for each individual:\
\>", "Text"],

Cell[BoxData[
    \(\(logLikelihood\[Sigma]2[\[Sigma]_, array_List] := 
        Plus @@ Map[logLikelihood\[Sigma]1[\[Sigma], #] &, 
            array];\)\)], "Input"],

Cell["\<\
Finally logLikelihood\[Sigma]3 takes a list of data from all families and \
applies logLikelihood\[Sigma]2 to each family and adds the results.\
\>", "Text"],

Cell[BoxData[
    \(\(logLikelihood\[Sigma]3[\[Sigma]_, array_List] := 
        Plus @@ Map[logLikelihood\[Sigma]2[\[Sigma], #] &, 
            array];\)\)], "Input"],

Cell["\<\
As an illustration,  here is a plot of the log likelihood if we combine all \
the data (i.e. assume all measurements have the same error):\
\>", "Text"],

Cell[CellGroupData[{

Cell[BoxData[
    \(\(Plot[
        logLikelihood\[Sigma]3[\[Sigma], data], {\[Sigma], 0.01, 
          0.05}];\)\)], "Input"],

Cell[GraphicsData["PostScript", "\<\
%!
%%Creator: Mathematica
%%AspectRatio: .61803 
MathPictureStart
/Mabs {
Mgmatrix idtransform
Mtmatrix dtransform
} bind def
/Mabsadd { Mabs
3 -1 roll add
3 1 roll add
exch } bind def
%% Graphics
%%IncludeResource: font Courier
%%IncludeFont: Courier
/Courier findfont 10  scalefont  setfont
% Scaling calculations
-0.214286 23.8095 -1.54859 0.00575851 [
[.2619 .05129 -12 -9 ]
[.2619 .05129 12 0 ]
[.5 .05129 -12 -9 ]
[.5 .05129 12 0 ]
[.7381 .05129 -12 -9 ]
[.7381 .05129 12 0 ]
[.97619 .05129 -12 -9 ]
[.97619 .05129 12 0 ]
[.01131 .17896 -18 -4.5 ]
[.01131 .17896 0 4.5 ]
[.01131 .29413 -18 -4.5 ]
[.01131 .29413 0 4.5 ]
[.01131 .4093 -18 -4.5 ]
[.01131 .4093 0 4.5 ]
[.01131 .52447 -18 -4.5 ]
[.01131 .52447 0 4.5 ]
[ 0 0 0 0 ]
[ 1 .61803 0 0 ]
] MathScale
% Start of Graphics
1 setlinecap
1 setlinejoin
newpath
0 g
.25 Mabswid
[ ] 0 setdash
.2619 .06379 m
.2619 .07004 L
s
[(0.02)] .2619 .05129 0 1 Mshowa
.5 .06379 m
.5 .07004 L
s
[(0.03)] .5 .05129 0 1 Mshowa
.7381 .06379 m
.7381 .07004 L
s
[(0.04)] .7381 .05129 0 1 Mshowa
.97619 .06379 m
.97619 .07004 L
s
[(0.05)] .97619 .05129 0 1 Mshowa
.125 Mabswid
.07143 .06379 m
.07143 .06754 L
s
.11905 .06379 m
.11905 .06754 L
s
.16667 .06379 m
.16667 .06754 L
s
.21429 .06379 m
.21429 .06754 L
s
.30952 .06379 m
.30952 .06754 L
s
.35714 .06379 m
.35714 .06754 L
s
.40476 .06379 m
.40476 .06754 L
s
.45238 .06379 m
.45238 .06754 L
s
.54762 .06379 m
.54762 .06754 L
s
.59524 .06379 m
.59524 .06754 L
s
.64286 .06379 m
.64286 .06754 L
s
.69048 .06379 m
.69048 .06754 L
s
.78571 .06379 m
.78571 .06754 L
s
.83333 .06379 m
.83333 .06754 L
s
.88095 .06379 m
.88095 .06754 L
s
.92857 .06379 m
.92857 .06754 L
s
.25 Mabswid
0 .06379 m
1 .06379 L
s
.02381 .17896 m
.03006 .17896 L
s
[(300)] .01131 .17896 1 0 Mshowa
.02381 .29413 m
.03006 .29413 L
s
[(320)] .01131 .29413 1 0 Mshowa
.02381 .4093 m
.03006 .4093 L
s
[(340)] .01131 .4093 1 0 Mshowa
.02381 .52447 m
.03006 .52447 L
s
[(360)] .01131 .52447 1 0 Mshowa
.125 Mabswid
.02381 .09259 m
.02756 .09259 L
s
.02381 .12138 m
.02756 .12138 L
s
.02381 .15017 m
.02756 .15017 L
s
.02381 .20776 m
.02756 .20776 L
s
.02381 .23655 m
.02756 .23655 L
s
.02381 .26534 m
.02756 .26534 L
s
.02381 .32293 m
.02756 .32293 L
s
.02381 .35172 m
.02756 .35172 L
s
.02381 .38051 m
.02756 .38051 L
s
.02381 .4381 m
.02756 .4381 L
s
.02381 .46689 m
.02756 .46689 L
s
.02381 .49568 m
.02756 .49568 L
s
.02381 .035 m
.02756 .035 L
s
.02381 .00621 m
.02756 .00621 L
s
.02381 .55327 m
.02756 .55327 L
s
.02381 .58206 m
.02756 .58206 L
s
.02381 .61085 m
.02756 .61085 L
s
.25 Mabswid
.02381 0 m
.02381 .61803 L
s
0 0 m
1 0 L
1 .61803 L
0 .61803 L
closepath
clip
newpath
.5 Mabswid
.02381 .32148 m
.04262 .41501 L
.06244 .48472 L
.07286 .51231 L
.08255 .53349 L
.09388 .55353 L
.10458 .56851 L
.11437 .57932 L
.125 .58835 L
.13466 .59445 L
.14357 .59851 L
.14823 .6001 L
.15324 .60142 L
.15567 .60193 L
.15797 .60234 L
.16024 .60266 L
.1623 .6029 L
.16477 .60312 L
.16613 .6032 L
.16741 .60326 L
.1686 .6033 L
.16969 .60331 L
.17089 .60332 L
.17216 .60331 L
.17344 .60327 L
.17416 .60325 L
.17481 .60322 L
.17729 .60307 L
.17868 .60295 L
.18018 .60281 L
.18292 .60248 L
.18777 .60172 L
.19232 .60081 L
.2027 .59806 L
.21281 .59458 L
.22371 .59005 L
.26485 .56732 L
.30447 .53964 L
.34258 .50983 L
.38314 .47616 L
.42218 .4428 L
.46368 .40698 L
.50366 .37256 L
.54213 .33978 L
.58305 .30545 L
.62245 .27304 L
.66034 .24254 L
.70068 .2108 L
.7395 .181 L
.78078 .15012 L
Mistroke
.82054 .12115 L
.85879 .09398 L
.89948 .06581 L
.93867 .03939 L
.97619 .01472 L
Mfstroke
% End of Graphics
MathPictureEnd
\
\>"], "Graphics",
  ImageSize->{288, 177.938},
  ImageMargins->{{43, 0}, {0, 0}},
  ImageRegion->{{0, 1}, {0, 1}},
  ImageCache->GraphicsData["Bitmap", "\<\
CF5dJ6E]HGAYHf4PAg9QL6QYHg<PAVmbKF5d0`40004P0000/A000`40O003h00Oogoo8Goo003oOolQ
Ool00?moob5oo`00ogoo8Goo003oOolQOol00?moob5oo`005Goo00<007ooOol0ogoo2Goo000EOol2
003oOol:Ool001Eoo`03001oogoo0?moo`Uoo`005Goo00<007ooOol0ogoo2Goo000EOol00`00Oomo
o`3kOol00`00Oomoo`0:Ool001Eoo`03001oogoo035oo`04JRL000007SX2Ool00gof<000l@03Ool0
1VXW000001hjOomnc0<0000300aKogoo02Qoo`04JRL000007SX2Ool00gof<000l@03Ool016XW0000
01hj0Woo00AZ9`000001URUoo`04JRL000007SX2Ool00gof<000l@03Ool016XW000001hj0goo00AZ
9`0000M7GbUoo`04JRL000007SX2Ool00gof<000l@0200001GooJRL000007SX00Woo00AZ9`00000N
>P9oo`005Goo00<007ooOol0<Goo00E5TGooOom4k5_o00Moo`09AI5oogooA>aKogooA>0035_o02]o
o`05AI5oogooA>aKo`07Ool02dFAOomoodC/FomoDAcaOomomS07Ael0:7oo00E5TGooOom4k5_o00Mo
o`05AI5oogooA>aKo`03Ool00gk<7SYoo`0YOol01DFAOomoodC/Fol00Woo0P000goo00M5TGooOom4
k5_oOe4Ll@02Ool1A>L1Ael1Ool001Eoo`03001oogoo031oo`06OoH`lGooOomIQdMO1Woo00IomS3a
OomooeV7Ael2Ool00gk<000bg`0YOol01Wof<?5oogooFHM7G`Ioo`06OoH`lGooOomIQdMO0Woo00=I
P000<]l0:7oo00IomS3aOomooeV7Ael6Ool027of<?5oogooFHM7Ggof<00200000`07Aemoo`0WOol0
27of<?5oogooFHM7Ggoo0004Ool01Wof<?5oogooFHM7G`Aoo`5IQ`57G`5oo`005Goo00<007ooOol0
<7oo00IomS3aOomooeV7Ael6Ool01Wof<?5oogooFHM7G`=oo`03OoIJggoo02Qoo`06OoH`lGooOomI
QdMO1Woo00IomS3aOomooeV7Ael3Ool00gof<?5oo`0WOol01Wof<?5oogooFHM7G`Ioo`0;OoH`lGoo
OomIQdMOOomIP3;OO/`N>P0YOol01Gof<?5oogooFHL00P001Goo00QomS3aOomooeV7AemooeV00P00
0@6F0Goo0Goo000EOol2000bOol01DCWAemomS0<Fol01goo00]4idMOOoH`35_oOe4LlGooOoH`35_o
02Uoo`05A>M7Ggof<0aKo`07Ool02dCWAemomS0<FomomS07AemomS0<Fol0:7oo00E4idMOOoH`35_o
00Moo`0:A>M7Ggof<0aKogooOoH`1dH/7SXZOol01DCWAel00000Fol01goo00Q4idMOOoH`35_oOomI
QdMO17oo000EOol00`00Oomoo`0aOol017mA700003;O27oo00AoDA`0000bg`9oo`04JRL000007SXZ
Ool017mA700003;O27oo00AoDA`0000bg`9oo`04Oe4L0000<]lYOol017mA700003;O27oo00AoDA`0
000bg`=oo`03Oe4L01hj02Yoo`04Oe400000<]l8Ool017mA700003;O0Woo00AIP0000001UP9oo`00
5Goo00<007ooOol0kgoo0P005goo000EOol00`00Oomoo`3^Ool00`00Oomoo`0GOol001Eoo`03001o
ogoo0>aoo`8001Yoo`005Goo00<007ooOol0jWoo0P0077oo000EOol00`00Oomoo`3YOol00`00Oomo
o`0LOol001Eoo`03001oogoo0>Moo`8001moo`003Wooo`003@001Woo000EOol00`00Oomoo`0:Ool0
0`00Oomoo`09Ool00`00Oomoo`0:Ool00`00Oomoo`0:Ool00`00Oomoo`09Ool00`00Oomoo`0:Ool0
0`00Oomoo`0:Ool00`00Oomoo`09Ool00`00Oomoo`0:Ool00`00Oomoo`0:Ool00`00Oomoo`09Ool0
0`00Oomoo`0:Ool00`00Oomoo`0:Ool00`00Oomoo`09Ool00`00Oomoo`0:Ool00`00Oomoo`0:Ool0
0`00Oomoo`09Ool00`00Oomoo`0:Ool00`00Oomoo`020008Ool00`00Oomoo`0:Ool00`00Oomoo`0:
Ool001Eoo`03001oogoo0>=oo`03001oogoo029oo`005Goo00<007ooOol0hWoo00<007ooOol08goo
000EOol00`00Oomoo`3POol2000VOol001Eoo`03001oogoo0=moo`03001oogoo02Ioo`005Goo00<0
07ooOol0gWoo00<007ooOol09goo000EOol2003MOol2000ZOol001Eoo`03001oogoo0=]oo`03001o
ogoo02Yoo`005Goo00<007ooOol0fGoo0P00;Goo000EOol00`00Oomoo`3HOol00`00Oomoo`0]Ool0
01Eoo`03001oogoo0=Moo`03001oogoo02ioo`005Goo00<007ooOol0eGoo0P00<Goo000EOol00`00
Oomoo`3DOol00`00Oomoo`0aOol001Eoo`03001oogoo0=9oo`8003Aoo`005Goo0P00dWoo00<007oo
Ool0=7oo000EOol00`00Oomoo`3?Ool2000gOol001Eoo`03001oogoo0<ioo`03001oogoo03Moo`00
5Goo00<007ooOol0cGoo00<007ooOol0>7oo000EOol00`00Oomoo`3;Ool2000kOol001Eoo`03001o
ogoo0<Yoo`03001oogoo03]oo`005Goo00<007ooOol0bGoo00<007ooOol0?7oo000EOol00`00Oomo
o`37Ool2000oOol001Eoo`800<Moo`03001oogoo03moo`005Goo00<007ooOol0a7oo0P00@Woo000E
Ool00`00Oomoo`33Ool00`00Oomoo`12Ool001Eoo`03001oogoo0<9oo`03001oogoo04=oo`005Goo
00<007ooOol0`7oo0P00AWoo00001GooJRL000000IH00Woo00AZ9`00000N>P9oo`04JRL000007SX4
Ool00`00Oomoo`2oOol00`00Oomoo`16Ool00008Oe4LlGooOoH`1dMOOom5T@9oo`04A>aKogooAI42
Ool00dC/Fomoo`02Ool00`00Oomoo`2nOol00`00Oomoo`17Ool0009oo`06FH0003;OOomomS3a0Woo
00AIQdMOOoH`l@9oo`03FHM7Ggoo009oo`800;eoo`8004Yoo`000goo00EomS3aOomomS3a009oo`04
FHM7Ggof<?42Ool00eV7Aemoo`02Ool00`00Oomoo`2kOol00`00Oomoo`1:Ool0000BOoH`1dMOOoH`
35_oOom4idMOOoH`35_oOom4idMOOoH`35_o0goo00<007ooOol0^Woo00<007ooOol0Bgoo00001Goo
Oe4L0000<]l00Woo00AoDA`0000bg`9oo`04Oe4L0000<]l4Ool00`00Oomoo`2hOol2001>Ool001Eo
o`03001oogoo0;Moo`03001oogoo04ioo`005Goo00<007ooOol0]Woo00<007ooOol0Cgoo000EOol0
0`00Oomoo`2eOol00`00Oomoo`1@Ool001Eoo`03001oogoo0;=oo`8005=oo`005Goo0P00/goo00<0
07ooOol0Dgoo000EOol00`00Oomoo`2aOol00`00Oomoo`1DOol001Eoo`03001oogoo0:moo`8005Mo
o`005Goo00<007ooOol0[Woo00<007ooOol0Egoo000EOol00`00Oomoo`2]Ool00`00Oomoo`1HOol0
01Eoo`03001oogoo0:]oo`8005]oo`005Goo00<007ooOol0ZWoo00<007ooOol0Fgoo000EOol00`00
Oomoo`2YOol00`00Oomoo`1LOol001Eoo`800:Qoo`8005moo`005Goo00<007ooOol0YWoo00<007oo
Ool0Ggoo000EOol00`00Oomoo`2UOol00`00Oomoo`1POol001Eoo`03001oogoo0:=oo`8006=oo`00
5Goo00<007ooOol0XWoo00<007ooOol0Hgoo000EOol00`00Oomoo`2QOol00`00Oomoo`1TOol001Eo
o`03001oogoo0:1oo`03001oogoo06Eoo`005Goo0P00Wgoo0P00J7oo000EOol00`00Oomoo`2MOol0
0`00Oomoo`1XOol001Eoo`03001oogoo09aoo`03001oogoo06Uoo`005Goo00<007ooOol0Vgoo00<0
07ooOol0JWoo000EOol00`00Oomoo`2JOol00`00Oomoo`1[Ool001Eoo`03001oogoo09Uoo`03001o
ogoo06aoo`0000MoofXW0000006FOomnc0030000100<FomoofXW0P0000<N>WooOol00Woo00<007oo
Ool0V7oo00<007ooOol0KGoo00002WmA7?5oogof<0M7GgooA>0035_o0goo00E5TGooOom4k5_o00=o
o`03001oogoo09Ioo`80071oo`000Woo00=IP000<]l00goo00Inc000<]moogof<?42Ool00eV7Aemo
o`02Ool2002FOol00`00Oomoo`1`Ool000=oo`03OoH`lGoo00=oo`05OoIJggooOoH`l@02Ool00eV7
Aemoo`02Ool00`00Oomoo`2DOol00`00Oomoo`1aOol0000BOoH`1dMOOoH`35_oOe4LlGooOoH`35_o
Oom4idMOOoH`35_o0goo00<007ooOol0Tgoo00<007ooOol0LWoo00001GooOe4L0000<]l00Woo00AZ
9`00000N>P9oo`04Oe4L0000<]l4Ool00`00Oomoo`2BOol00`00Oomoo`1cOol001Eoo`03001oogoo
095oo`03001oogoo07Aoo`005Goo00<007ooOol0Sgoo0P00Mgoo000EOol00`00Oomoo`2>Ool00`00
Oomoo`1gOol001Eoo`03001oogoo08eoo`03001oogoo07Qoo`005Goo0P00SGoo00<007ooOol0NGoo
000EOol00`00Oomoo`2;Ool00`00Oomoo`1jOol001Eoo`8008Yoo`8007eoo`005Goo0P00RGoo00<0
07ooOol0OGoo000EOol20028Ool00`00Oomoo`1nOol001Eoo`8008Moo`03001oogoo07moo`005Goo
0P00QWoo00<007ooOol0P7oo000EOol30024Ool00`00Oomoo`21Ool001Eoo`03001oo`0008=oo`03
001oogoo089oo`005Goo00<007oo0000PGoo0P00QGoo000EOol00`00Ool00020Ool00`00Oomoo`25
Ool001Eoo`03001oo`0007moo`03001oogoo08Ioo`005Goo00@007ooOol007eoo`03001oogoo08Mo
o`005Goo00@007ooOol007aoo`03001oogoo08Qoo`005Goo00@007ooOol007]oo`03001oogoo08Uo
o`005Goo0P0000=oo`00Ool0N7oo0P00S7oo000EOol01000Oomoo`00N7oo00<007ooOol0S7oo000E
Ool01@00Oomoogoo0000MWoo00<007ooOol0SGoo000EOol01@00Oomoogoo0000MGoo00<007ooOol0
SWoo000EOol01@00Oomoogoo0000M7oo00<007ooOol0Sgoo000EOol01@00Oomoogoo0000LWoo0P00
TWoo00001GooJRL000000IH00goo00IZ9`0000M7GgooJRL200000ahjOomoo`02Ool01@00Oomoogoo
0000LGoo00<007ooOol0TWoo00001WmA7?5oogof<0M7G`=oo`05O/`N>WooOom5T@02Ool00dC/Fomo
o`02Ool00`00Oomoo`02Ool00`00Oomoo`1]Ool00`00Oomoo`2COol0009oo`06FH0003;OOomomS00
0P0000@01dMOOoH`l@9oo`03FHM7Ggoo009oo`8000=oo`03001oogoo06aoo`03001oogoo09Aoo`00
0goo00]omS3aOomooeV0<]mnc1hjOomomS3a009oo`03FHM7Ggoo009oo`03001oogoo009oo`03001o
ogoo06]oo`03001oogoo09Eoo`0000]omS07AemomS0<Fomoogof<0M6;1hj009oo`05A>M7Ggof<0aK
o`03Ool00`00Oomoo`02Ool00`00Oomoo`1ZOol00`00Oomoo`2FOol00005OomoDA`0000bg`03Ool0
0gmA700N>P02Ool017mA700003;O17oo00<007ooOol00goo00<007ooOol0J7oo00<007ooOol0Ugoo
000EOol00`00Oomoo`03Ool00`00Oomoo`1VOol2002JOol001Eoo`03001oogoo00=oo`03001oogoo
06Eoo`03001oogoo09Yoo`005Goo00<007ooOol00goo00<007ooOol0I7oo00<007ooOol0Vgoo000E
Ool20005Ool00`00Oomoo`1ROol00`00Oomoo`2LOol001Eoo`03001oogoo00Aoo`03001oogoo065o
o`03001oogoo09eoo`005Goo00<007ooOol017oo00<007ooOol0H7oo00<007ooOol0WWoo000EOol0
0`00Oomoo`04Ool00`00Oomoo`1OOol00`00Oomoo`2OOol001Eoo`03001oogoo00Eoo`03001oogoo
05eoo`03001oogoo0:1oo`005Goo00<007ooOol01Goo00<007ooOol0G7oo00<007ooOol0XGoo000E
Ool00`00Oomoo`05Ool00`00Oomoo`1KOol00`00Oomoo`2ROol001Eoo`03001oogoo00Eoo`03001o
ogoo05Uoo`800:Eoo`005Goo0P001goo00<007ooOol0Egoo00<007ooOol0YGoo000EOol00`00Oomo
o`06Ool00`00Oomoo`1FOol00`00Oomoo`2VOol001Eoo`03001oogoo00Ioo`03001oogoo05Eoo`03
001oogoo0:Moo`005Goo00<007ooOol01Woo00<007ooOol0E7oo00<007ooOol0Z7oo000EOol00`00
Oomoo`07Ool00`00Oomoo`1BOol00`00Oomoo`2YOol001Eoo`03001oogoo00Moo`03001oogoo051o
o`800:aoo`005Goo00<007ooOol01goo00<007ooOol0Cgoo00<007ooOol0[7oo000EOol00`00Oomo
o`08Ool00`00Oomoo`1=Ool00`00Oomoo`2]Ool001Eoo`8000Uoo`03001oogoo04aoo`03001oogoo
0:ioo`005Goo00<007ooOol02Goo00<007ooOol0BWoo00<007ooOol0[goo000EOol00`00Oomoo`09
Ool00`00Oomoo`18Ool2002bOol001Eoo`03001oogoo00Yoo`03001oogoo04Ioo`03001oogoo0;9o
o`005Goo00<007ooOol02Woo00<007ooOol0AGoo00<007ooOol0/goo00001GooJRL000000IH00Woo
00MomS0000001dMOOomZ9`0200000ahjOomoo`02Ool00`00Oomoo`0:Ool00`00Oomoo`13Ool2002f
Ool0000>Oe4LlGooOoH`1dMOOomIP3;OOomomU[OOom5T@9oo`03A>aKogoo009oo`03001oogoo00]o
o`03001oogoo045oo`03001oogoo0;Ioo`000Woo00aIP000<]moogof<00N>WooJRLbggof<?42Ool0
0eV7Aemoo`02Ool2000<Ool00`00Oomoo`10Ool00`00Oomoo`2gOol000=oo`0;OoH`lGooOom4k1cP
0000lGooOoH`l@02Ool00eV7Aemoo`02Ool00`00Oomoo`0;Ool00`00Oomoo`0nOol2002jOol00009
OoH`1dMOOoH`35_oOomnc03a00Aoo`05A>M7Ggof<0aKo`03Ool00`00Oomoo`0<Ool00`00Oomoo`0l
Ool00`00Oomoo`2jOol00005OomoDA`0000bg`03Ool02FXW000003;OOomoDA`0000bg`04Ool00`00
Oomoo`0<Ool00`00Oomoo`0jOol2002mOol001Eoo`03001oogoo00eoo`03001oogoo03Qoo`03001o
ogoo0;eoo`005Goo00<007ooOol03Goo00<007ooOol0=Woo0P00`7oo000EOol00`00Oomoo`0>Ool0
0`00Oomoo`0dOol00`00Oomoo`30Ool001Eoo`03001oogoo00ioo`03001oogoo03=oo`03001oogoo
0<5oo`005Goo0P0047oo00<007ooOol0<7oo0P00a7oo000EOol00`00Oomoo`0@Ool00`00Oomoo`0^
Ool00`00Oomoo`34Ool001Eoo`03001oogoo011oo`03001oogoo02eoo`03001oogoo0<Eoo`005Goo
00<007ooOol04Goo00<007ooOol0:Woo0P00b7oo000EOol00`00Oomoo`0BOol00`00Oomoo`0XOol0
0`00Oomoo`38Ool001Eoo`03001oogoo01=oo`03001oogoo02Eoo`800<]oo`005Goo00<007ooOol0
57oo00<007ooOol08Woo0P00cGoo000EOol00`00Oomoo`0EOol00`00Oomoo`0OOol2003?Ool001Eo
o`8001Moo`8001eoo`800=5oo`005Goo00<007ooOol067oo00<007ooOol067oo0P00dgoo000EOol0
0`00Oomoo`0IOol00`00Oomoo`0EOol2003EOol001Eoo`03001oogoo01Yoo`80019oo`<00=Moo`00
5Goo00<007ooOol077oo0P003Woo0P00fWoo000EOol00`00Oomoo`0NOol>003LOol001Eoo`03001o
ogoo0?moo`Uoo`005Goo0P00ogoo2Woo000EOol00`00Oomoo`3oOol9Ool001Eoo`03001oogoo0?mo
o`Uoo`00ogoo8Goo003oOolQOol00?moob5oo`00ogoo8Goo003oOolQOol00?moob5oo`00\
\>"],
  ImageRangeCache->{{{0, 287}, {176.938, 0}} -> {0.00663648, 264.904, \
0.000157686, 0.65198}}]
}, Open  ]],

Cell["\<\
This is a bit slow to calculate, as it requires integration, so we evaluate \
it on some grid points and create an interpolating function over those grid \
points to save time.

This procedure takes an input function and returns two approximating \
functions: one approximates the input function, the other is the exponential \
of the input function normalized to integate to one. (I.e. if the input \
function is a log likelihood, the second approximating function is the \
corresponding posterior probability, assuming a flat prior.)\
\>", "Text"],

Cell[BoxData[
    \(\(interpolationFromLogLikelihood[f_, min_, max_] := 
        Module[\[IndentingNewLine]{data, logInterp, norm, 
            dataMax}, \[IndentingNewLine]\ 
          data = \ Table[{x, f[x]}, {x, min, 
                max, \((max - min)\)/50}]; \[IndentingNewLine]logInterp\  = \ 
            Interpolation[data]; \[IndentingNewLine] (*\ 
            Scale\ data\ to\ avoid\ over/
                underflow\ *) \[IndentingNewLine]dataMax\  = \ 
            Max[data\[LeftDoubleBracket]All, 
                2\[RightDoubleBracket]]; \[IndentingNewLine]norm\  = \ 
            NIntegrate[
              Exp[logInterp[x] - dataMax], {x, min, 
                max}]; \[IndentingNewLine]linInterp\  = \ 
            Interpolation[
              Map[{#\[LeftDoubleBracket]1\[RightDoubleBracket], 
                    Exp[#\[LeftDoubleBracket]2\[RightDoubleBracket] - 
                          dataMax]/norm} &, 
                data]]; \[IndentingNewLine]Return[{logInterp, 
              linInterp}];\[IndentingNewLine]];\)\)], "Input"],

Cell["\<\
And we create interpolating functions for our various subsets of the data. \
(This takes a few seconds to calculate. The warning message is not \
significant.)\
\>", "Text"],

Cell[BoxData[{
    \(min\[Sigma] = 0.005; \ max\[Sigma] = 0.035;\), "\[IndentingNewLine]", 
    \(\({\[Sigma]LogPDFallData, \[Sigma]PDFallData\ } = \ 
        interpolationFromLogLikelihood[logLikelihood\[Sigma]3[#, data] &, 
          min\[Sigma], max\[Sigma]];\)\), "\[IndentingNewLine]", 
    \(\({\[Sigma]LogPDFmData, \[Sigma]PDFmData}\  = \ 
        interpolationFromLogLikelihood[logLikelihood\[Sigma]3[#, mData] &, 
          min\[Sigma], max\[Sigma]];\)\), "\[IndentingNewLine]", 
    \(\({\[Sigma]LogPDFeData, \[Sigma]PDFeData}\  = \ 
        interpolationFromLogLikelihood[logLikelihood\[Sigma]3[#, eData] &, 
          min\[Sigma], max\[Sigma]];\)\), "\[IndentingNewLine]", 
    \(\({\[Sigma]LogPDFfData, \[Sigma]PDFfData}\  = \ 
        interpolationFromLogLikelihood[logLikelihood\[Sigma]3[#, fData] &, 
          min\[Sigma], max\[Sigma]];\)\), "\[IndentingNewLine]", 
    \(\({\[Sigma]LogPDFmeData, \[Sigma]PDFmeData}\  = \ 
        interpolationFromLogLikelihood[logLikelihood\[Sigma]3[#, meData] &, 
          min\[Sigma], max\[Sigma]];\)\), "\[IndentingNewLine]", 
    \(\({\[Sigma]LogPDFmfData, \[Sigma]PDFmfData}\  = \ 
        interpolationFromLogLikelihood[logLikelihood\[Sigma]3[#, mfData] &, 
          min\[Sigma], max\[Sigma]];\)\)}], "Input"],

Cell["For example, for all the data lumped together:", "Text"],

Cell[CellGroupData[{

Cell[BoxData[{
    \(\(Plot[\[Sigma]LogPDFallData[x], {x, 0.005, 
          0.035}];\)\), "\[IndentingNewLine]", 
    \(\(Plot[\[Sigma]PDFallData[x], {x, 0.005, 0.035}, 
        PlotRange\  \[Rule] \ All];\)\), "\[IndentingNewLine]", 
    \(\)}], "Input"],

Cell[CellGroupData[{

Cell[GraphicsData["PostScript", "\<\
%!
%%Creator: Mathematica
%%AspectRatio: .61803 
MathPictureStart
/Mabs {
Mgmatrix idtransform
Mtmatrix dtransform
} bind def
/Mabsadd { Mabs
3 -1 roll add
3 1 roll add
exch } bind def
%% Graphics
%%IncludeResource: font Courier
%%IncludeFont: Courier
/Courier findfont 10  scalefont  setfont
% Scaling calculations
0.0238095 27.2109 -0.944033 0.00414071 [
[.15986 .03724 -15 -9 ]
[.15986 .03724 15 0 ]
[.29592 .03724 -12 -9 ]
[.29592 .03724 12 0 ]
[.43197 .03724 -15 -9 ]
[.43197 .03724 15 0 ]
[.56803 .03724 -12 -9 ]
[.56803 .03724 12 0 ]
[.70408 .03724 -15 -9 ]
[.70408 .03724 15 0 ]
[.84014 .03724 -12 -9 ]
[.84014 .03724 12 0 ]
[.97619 .03724 -15 -9 ]
[.97619 .03724 15 0 ]
[.01131 .13255 -18 -4.5 ]
[.01131 .13255 0 4.5 ]
[.01131 .21537 -18 -4.5 ]
[.01131 .21537 0 4.5 ]
[.01131 .29818 -18 -4.5 ]
[.01131 .29818 0 4.5 ]
[.01131 .38099 -18 -4.5 ]
[.01131 .38099 0 4.5 ]
[.01131 .46381 -18 -4.5 ]
[.01131 .46381 0 4.5 ]
[.01131 .54662 -18 -4.5 ]
[.01131 .54662 0 4.5 ]
[ 0 0 0 0 ]
[ 1 .61803 0 0 ]
] MathScale
% Start of Graphics
1 setlinecap
1 setlinejoin
newpath
0 g
.25 Mabswid
[ ] 0 setdash
.15986 .04974 m
.15986 .05599 L
s
[(0.005)] .15986 .03724 0 1 Mshowa
.29592 .04974 m
.29592 .05599 L
s
[(0.01)] .29592 .03724 0 1 Mshowa
.43197 .04974 m
.43197 .05599 L
s
[(0.015)] .43197 .03724 0 1 Mshowa
.56803 .04974 m
.56803 .05599 L
s
[(0.02)] .56803 .03724 0 1 Mshowa
.70408 .04974 m
.70408 .05599 L
s
[(0.025)] .70408 .03724 0 1 Mshowa
.84014 .04974 m
.84014 .05599 L
s
[(0.03)] .84014 .03724 0 1 Mshowa
.97619 .04974 m
.97619 .05599 L
s
[(0.035)] .97619 .03724 0 1 Mshowa
.125 Mabswid
.05102 .04974 m
.05102 .05349 L
s
.07823 .04974 m
.07823 .05349 L
s
.10544 .04974 m
.10544 .05349 L
s
.13265 .04974 m
.13265 .05349 L
s
.18707 .04974 m
.18707 .05349 L
s
.21429 .04974 m
.21429 .05349 L
s
.2415 .04974 m
.2415 .05349 L
s
.26871 .04974 m
.26871 .05349 L
s
.32313 .04974 m
.32313 .05349 L
s
.35034 .04974 m
.35034 .05349 L
s
.37755 .04974 m
.37755 .05349 L
s
.40476 .04974 m
.40476 .05349 L
s
.45918 .04974 m
.45918 .05349 L
s
.48639 .04974 m
.48639 .05349 L
s
.51361 .04974 m
.51361 .05349 L
s
.54082 .04974 m
.54082 .05349 L
s
.59524 .04974 m
.59524 .05349 L
s
.62245 .04974 m
.62245 .05349 L
s
.64966 .04974 m
.64966 .05349 L
s
.67687 .04974 m
.67687 .05349 L
s
.73129 .04974 m
.73129 .05349 L
s
.7585 .04974 m
.7585 .05349 L
s
.78571 .04974 m
.78571 .05349 L
s
.81293 .04974 m
.81293 .05349 L
s
.86735 .04974 m
.86735 .05349 L
s
.89456 .04974 m
.89456 .05349 L
s
.92177 .04974 m
.92177 .05349 L
s
.94898 .04974 m
.94898 .05349 L
s
.25 Mabswid
0 .04974 m
1 .04974 L
s
.02381 .13255 m
.03006 .13255 L
s
[(260)] .01131 .13255 1 0 Mshowa
.02381 .21537 m
.03006 .21537 L
s
[(280)] .01131 .21537 1 0 Mshowa
.02381 .29818 m
.03006 .29818 L
s
[(300)] .01131 .29818 1 0 Mshowa
.02381 .38099 m
.03006 .38099 L
s
[(320)] .01131 .38099 1 0 Mshowa
.02381 .46381 m
.03006 .46381 L
s
[(340)] .01131 .46381 1 0 Mshowa
.02381 .54662 m
.03006 .54662 L
s
[(360)] .01131 .54662 1 0 Mshowa
.125 Mabswid
.02381 .07044 m
.02756 .07044 L
s
.02381 .09114 m
.02756 .09114 L
s
.02381 .11185 m
.02756 .11185 L
s
.02381 .15326 m
.02756 .15326 L
s
.02381 .17396 m
.02756 .17396 L
s
.02381 .19466 m
.02756 .19466 L
s
.02381 .23607 m
.02756 .23607 L
s
.02381 .25677 m
.02756 .25677 L
s
.02381 .27748 m
.02756 .27748 L
s
.02381 .31888 m
.02756 .31888 L
s
.02381 .33959 m
.02756 .33959 L
s
.02381 .36029 m
.02756 .36029 L
s
.02381 .4017 m
.02756 .4017 L
s
.02381 .4224 m
.02756 .4224 L
s
.02381 .44311 m
.02756 .44311 L
s
.02381 .48451 m
.02756 .48451 L
s
.02381 .50522 m
.02756 .50522 L
s
.02381 .52592 m
.02756 .52592 L
s
.02381 .02903 m
.02756 .02903 L
s
.02381 .00833 m
.02756 .00833 L
s
.02381 .56733 m
.02756 .56733 L
s
.02381 .58803 m
.02756 .58803 L
s
.02381 .60873 m
.02756 .60873 L
s
.25 Mabswid
.02381 0 m
.02381 .61803 L
s
0 0 m
1 0 L
1 .61803 L
0 .61803 L
closepath
clip
newpath
.5 Mabswid
.23322 0 m
.24736 .13198 L
.26462 .25196 L
.28174 .34227 L
.29755 .40661 L
.3136 .45758 L
.33128 .50071 L
.34791 .53155 L
.36581 .55646 L
.38392 .57479 L
.39226 .5813 L
.40114 .5871 L
.41005 .59185 L
.41812 .59532 L
.42578 .59796 L
.43388 .60012 L
.43798 .60097 L
.44247 .60175 L
.44661 .60232 L
.45038 .60272 L
.45251 .6029 L
.45483 .60306 L
.45611 .60313 L
.45728 .60318 L
.45848 .60323 L
.45961 .60326 L
.46056 .60329 L
.46159 .6033 L
.46215 .60331 L
.46274 .60332 L
.46378 .60332 L
.46488 .60331 L
.4659 .6033 L
.46703 .60328 L
.46822 .60325 L
.47044 .60317 L
.47279 .60306 L
.477 .60278 L
.48153 .60236 L
.48652 .60178 L
.49544 .60043 L
.50379 .59885 L
.53707 .58994 L
.57245 .577 L
.60653 .56224 L
.63931 .54659 L
.6742 .52891 L
.70778 .51125 L
.74347 .49208 L
.77785 .47343 L
Mistroke
.81094 .45545 L
.84613 .43641 L
.88002 .41822 L
.91262 .40092 L
.94731 .38274 L
.97619 .36782 L
Mfstroke
% End of Graphics
MathPictureEnd
\
\>"], "Graphics",
  ImageSize->{288, 177.938},
  ImageMargins->{{43, 0}, {0, 0}},
  ImageRegion->{{0, 1}, {0, 1}},
  ImageCacheValid->False],

Cell[GraphicsData["PostScript", "\<\
%!
%%Creator: Mathematica
%%AspectRatio: .61803 
MathPictureStart
/Mabs {
Mgmatrix idtransform
Mtmatrix dtransform
} bind def
/Mabsadd { Mabs
3 -1 roll add
3 1 roll add
exch } bind def
%% Graphics
%%IncludeResource: font Courier
%%IncludeFont: Courier
/Courier findfont 10  scalefont  setfont
% Scaling calculations
-0.134921 31.746 0.0151173 0.00139838 [
[.02381 .00262 -15 -9 ]
[.02381 .00262 15 0 ]
[.34127 .00262 -15 -9 ]
[.34127 .00262 15 0 ]
[.5 .00262 -12 -9 ]
[.5 .00262 12 0 ]
[.65873 .00262 -15 -9 ]
[.65873 .00262 15 0 ]
[.81746 .00262 -12 -9 ]
[.81746 .00262 12 0 ]
[.97619 .00262 -15 -9 ]
[.97619 .00262 15 0 ]
[.17004 .15496 -18 -4.5 ]
[.17004 .15496 0 4.5 ]
[.17004 .29479 -18 -4.5 ]
[.17004 .29479 0 4.5 ]
[.17004 .43463 -18 -4.5 ]
[.17004 .43463 0 4.5 ]
[.17004 .57447 -18 -4.5 ]
[.17004 .57447 0 4.5 ]
[ 0 0 0 0 ]
[ 1 .61803 0 0 ]
] MathScale
% Start of Graphics
1 setlinecap
1 setlinejoin
newpath
0 g
.25 Mabswid
[ ] 0 setdash
.02381 .01512 m
.02381 .02137 L
s
[(0.005)] .02381 .00262 0 1 Mshowa
.34127 .01512 m
.34127 .02137 L
s
[(0.015)] .34127 .00262 0 1 Mshowa
.5 .01512 m
.5 .02137 L
s
[(0.02)] .5 .00262 0 1 Mshowa
.65873 .01512 m
.65873 .02137 L
s
[(0.025)] .65873 .00262 0 1 Mshowa
.81746 .01512 m
.81746 .02137 L
s
[(0.03)] .81746 .00262 0 1 Mshowa
.97619 .01512 m
.97619 .02137 L
s
[(0.035)] .97619 .00262 0 1 Mshowa
.125 Mabswid
.05556 .01512 m
.05556 .01887 L
s
.0873 .01512 m
.0873 .01887 L
s
.11905 .01512 m
.11905 .01887 L
s
.15079 .01512 m
.15079 .01887 L
s
.21429 .01512 m
.21429 .01887 L
s
.24603 .01512 m
.24603 .01887 L
s
.27778 .01512 m
.27778 .01887 L
s
.30952 .01512 m
.30952 .01887 L
s
.37302 .01512 m
.37302 .01887 L
s
.40476 .01512 m
.40476 .01887 L
s
.43651 .01512 m
.43651 .01887 L
s
.46825 .01512 m
.46825 .01887 L
s
.53175 .01512 m
.53175 .01887 L
s
.56349 .01512 m
.56349 .01887 L
s
.59524 .01512 m
.59524 .01887 L
s
.62698 .01512 m
.62698 .01887 L
s
.69048 .01512 m
.69048 .01887 L
s
.72222 .01512 m
.72222 .01887 L
s
.75397 .01512 m
.75397 .01887 L
s
.78571 .01512 m
.78571 .01887 L
s
.84921 .01512 m
.84921 .01887 L
s
.88095 .01512 m
.88095 .01887 L
s
.9127 .01512 m
.9127 .01887 L
s
.94444 .01512 m
.94444 .01887 L
s
.25 Mabswid
0 .01512 m
1 .01512 L
s
.18254 .15496 m
.18879 .15496 L
s
[(100)] .17004 .15496 1 0 Mshowa
.18254 .29479 m
.18879 .29479 L
s
[(200)] .17004 .29479 1 0 Mshowa
.18254 .43463 m
.18879 .43463 L
s
[(300)] .17004 .43463 1 0 Mshowa
.18254 .57447 m
.18879 .57447 L
s
[(400)] .17004 .57447 1 0 Mshowa
.125 Mabswid
.18254 .04308 m
.18629 .04308 L
s
.18254 .07105 m
.18629 .07105 L
s
.18254 .09902 m
.18629 .09902 L
s
.18254 .12699 m
.18629 .12699 L
s
.18254 .18292 m
.18629 .18292 L
s
.18254 .21089 m
.18629 .21089 L
s
.18254 .23886 m
.18629 .23886 L
s
.18254 .26683 m
.18629 .26683 L
s
.18254 .32276 m
.18629 .32276 L
s
.18254 .35073 m
.18629 .35073 L
s
.18254 .3787 m
.18629 .3787 L
s
.18254 .40666 m
.18629 .40666 L
s
.18254 .4626 m
.18629 .4626 L
s
.18254 .49057 m
.18629 .49057 L
s
.18254 .51854 m
.18629 .51854 L
s
.18254 .5465 m
.18629 .5465 L
s
.18254 .60244 m
.18629 .60244 L
s
.25 Mabswid
.18254 0 m
.18254 .61803 L
s
.5 Mabswid
.02381 .01512 m
.02499 .01512 L
.02605 .01512 L
.02729 .01512 L
.02846 .01512 L
.02954 .01512 L
.03053 .01512 L
.03163 .01512 L
.03279 .01512 L
.03395 .01512 L
.0352 .01512 L
.03638 .01512 L
.03746 .01512 L
.04262 .01512 L
.04748 .01512 L
.04881 .01512 L
.05023 .01512 L
.05092 .01512 L
.05157 .01512 L
.05278 .01512 L
.05396 .01512 L
.0552 .01512 L
.05626 .01512 L
.05742 .01512 L
.05868 .01512 L
.06002 .01512 L
.06129 .01512 L
.06244 .01512 L
.06504 .01512 L
.06747 .01512 L
.06879 .01512 L
.07001 .01512 L
.07066 .01512 L
.07136 .01512 L
.07205 .01512 L
.07281 .01512 L
.07358 .01512 L
.07428 .01512 L
.07508 .01512 L
.07584 .01512 L
.07655 .01512 L
.0772 .01512 L
.07866 .01512 L
.07992 .01512 L
.08063 .01512 L
.0813 .01512 L
.082 .01512 L
.08264 .01512 L
.08408 .01512 L
.08652 .01512 L
Mistroke
.08786 .01512 L
.08911 .01512 L
.08983 .01512 L
.09061 .01512 L
.09131 .01512 L
.09196 .01512 L
.09324 .01512 L
.09389 .01512 L
.0946 .01512 L
.0959 .01512 L
.09709 .01512 L
.09846 .01512 L
.09976 .01512 L
.10096 .01512 L
.10207 .01512 L
.10458 .01512 L
.10576 .01512 L
.10701 .01512 L
.10807 .01512 L
.10923 .01512 L
.11048 .01512 L
.11118 .01512 L
.11182 .01512 L
.11306 .01512 L
.11423 .01512 L
.11533 .01512 L
.11649 .01512 L
.1175 .01512 L
.11858 .01512 L
.11974 .01512 L
.12082 .01512 L
.12328 .01512 L
.12457 .01512 L
.12593 .01512 L
.12664 .01512 L
.12743 .01512 L
.12814 .01512 L
.12882 .01512 L
.13013 .01512 L
.13134 .01512 L
.13197 .01512 L
.13266 .01512 L
.13339 .01512 L
.13406 .01512 L
.13534 .01512 L
.13655 .01512 L
.13764 .01512 L
.13882 .01512 L
.1401 .01512 L
.14146 .01512 L
Mistroke
.1439 .01512 L
.14511 .01512 L
.14642 .01512 L
.14767 .01512 L
.14882 .01512 L
.14996 .01512 L
.151 .01512 L
.15219 .01512 L
.15332 .01512 L
.15455 .01512 L
.15585 .01512 L
.15697 .01512 L
.15819 .01512 L
.16094 .01512 L
.16214 .01512 L
.16345 .01512 L
.16467 .01512 L
.1658 .01512 L
.16687 .01512 L
.16802 .01512 L
.16922 .01512 L
.17035 .01512 L
.17158 .01512 L
.17228 .01512 L
.17292 .01512 L
.17497 .01512 L
.17614 .01512 L
.17722 .01512 L
.17942 .01512 L
.18175 .01512 L
.18301 .01512 L
.18367 .01512 L
.18438 .01512 L
.18564 .01512 L
.18681 .01512 L
.18751 .01512 L
.18828 .01512 L
.189 .01512 L
.18967 .01512 L
.19094 .01512 L
.19165 .01512 L
.19229 .01512 L
.19349 .01512 L
.19475 .01512 L
.19541 .01512 L
.19614 .01512 L
.19741 .01512 L
.19993 .01512 L
.20223 .01512 L
.20337 .01512 L
Mistroke
.20462 .01512 L
.20579 .01512 L
.20688 .01512 L
.20802 .01512 L
.20929 .01512 L
.21061 .01512 L
.21185 .01512 L
.21301 .01512 L
.21411 .01512 L
.21509 .01512 L
.21617 .01512 L
.21859 .01512 L
.22082 .01512 L
.22206 .01512 L
.22337 .01512 L
.22468 .01512 L
.22543 .01512 L
.22613 .01512 L
.22739 .01512 L
.22854 .01512 L
.22918 .01512 L
.22987 .01512 L
.23113 .01512 L
.23225 .01512 L
.23348 .01512 L
.23478 .01512 L
.23599 .01512 L
.23813 .01512 L
.23927 .01512 L
.24048 .01512 L
.24118 .01512 L
.24181 .01512 L
.24305 .01511 L
.24371 .01511 L
.24443 .01511 L
.24575 .01512 L
.24696 .01512 L
.24826 .01512 L
.24936 .01512 L
.25057 .01512 L
.2513 .01512 L
.25199 .01512 L
.25328 .01511 L
.25619 .01508 L
.25741 .01507 L
.25871 .01506 L
.25945 .01506 L
.26013 .01505 L
.26145 .01505 L
.26266 .01505 L
Mistroke
.26378 .01505 L
.26502 .01506 L
.26634 .01507 L
.267 .01507 L
.26773 .01508 L
.26904 .0151 L
.27021 .01513 L
.2715 .01515 L
.2727 .01504 L
.27382 .01495 L
.27511 .01486 L
.27629 .01479 L
.27733 .01474 L
.27843 .01472 L
.27953 .01472 L
.28073 .01474 L
.2814 .01477 L
.28214 .01482 L
.28283 .01487 L
.28347 .01494 L
.28467 .01509 L
.28595 .01531 L
.29152 .0166 L
.29271 .0167 L
.29383 .01688 L
.29512 .0172 L
.2963 .01762 L
.2976 .01823 L
.29902 .0191 L
.30156 .02126 L
.30388 .02403 L
.30639 .02798 L
.30876 .03275 L
.31094 .03823 L
.31598 .05515 L
.3213 .07995 L
.32649 .11201 L
.33132 .1537 L
.3423 .27758 L
.35138 .39286 L
.361 .50944 L
.36342 .53436 L
.36602 .55828 L
.36751 .56899 L
.36888 .57673 L
.37155 .58905 L
.37271 .59319 L
.37394 .59683 L
.37465 .59856 L
.37529 .59989 L
Mistroke
.37655 .60187 L
.37772 .60296 L
.37899 .60332 L
.38019 .60287 L
.3813 .60179 L
.38253 .59981 L
.38385 .5968 L
.3851 .5931 L
.38624 .5883 L
.38902 .5717 L
.39166 .55272 L
.40261 .44949 L
.41237 .34525 L
.42275 .23819 L
.43222 .16264 L
.43724 .13006 L
.44266 .10044 L
.44762 .07972 L
.45217 .06451 L
.45684 .05213 L
.46109 .04332 L
.46583 .03548 L
.47089 .02928 L
.47315 .02716 L
.47559 .02524 L
.48002 .02259 L
.48525 .02004 L
.48789 .01905 L
.49079 .01819 L
.49326 .01763 L
.49592 .01717 L
.49843 .01685 L
.50072 .0166 L
.50318 .01628 L
.5055 .01604 L
.50817 .01583 L
.51059 .01568 L
.51289 .01558 L
.51499 .01551 L
.5161 .01548 L
.51731 .01546 L
.51975 .01541 L
.52241 .01533 L
.52493 .01528 L
.52632 .01526 L
.52784 .01523 L
.52909 .01522 L
.53048 .01521 L
.5317 .0152 L
.533 .01519 L
Mistroke
.53439 .01518 L
.53568 .01518 L
.54049 .01516 L
.543 .01515 L
.54537 .01514 L
.54668 .01514 L
.5481 .01513 L
.54928 .01513 L
.55058 .01513 L
.55203 .01513 L
.55282 .01513 L
.55355 .01513 L
.55488 .01513 L
.55562 .01513 L
.55629 .01513 L
.5576 .01513 L
.55834 .01513 L
.55902 .01512 L
.5616 .01512 L
.56399 .01512 L
.56623 .01512 L
.56751 .01512 L
.56869 .01512 L
.56998 .01512 L
.57063 .01512 L
.57134 .01512 L
.57258 .01512 L
.57389 .01512 L
.57458 .01512 L
.57533 .01512 L
.57602 .01512 L
.57666 .01512 L
.57929 .01512 L
.58169 .01512 L
.5829 .01512 L
.58422 .01512 L
.58549 .01512 L
.58663 .01512 L
.58797 .01512 L
.5887 .01512 L
.58939 .01512 L
.59062 .01512 L
.59131 .01512 L
.59195 .01512 L
.59308 .01512 L
.5943 .01512 L
.59544 .01512 L
.59649 .01512 L
.59877 .01512 L
.60128 .01512 L
Mistroke
.60258 .01512 L
.60396 .01512 L
.60514 .01512 L
.60643 .01512 L
.60716 .01512 L
.60783 .01512 L
.60856 .01512 L
.60933 .01512 L
.61062 .01512 L
.61136 .01512 L
.61204 .01512 L
.61268 .01512 L
.61337 .01512 L
.61462 .01512 L
.61584 .01512 L
.61696 .01512 L
.61952 .01512 L
.62081 .01512 L
.62222 .01512 L
.62352 .01512 L
.62472 .01512 L
.62604 .01512 L
.62678 .01512 L
.62744 .01512 L
.62867 .01512 L
.62936 .01512 L
.63 .01512 L
.63117 .01512 L
.6324 .01512 L
.63351 .01512 L
.63469 .01512 L
.63683 .01512 L
.63814 .01512 L
.63938 .01512 L
.64057 .01512 L
.64169 .01512 L
.64289 .01512 L
.64359 .01512 L
.64422 .01512 L
.64551 .01512 L
.64622 .01512 L
.6469 .01512 L
.64809 .01512 L
.6492 .01512 L
.65042 .01512 L
.65171 .01512 L
.65245 .01512 L
.65312 .01512 L
.65465 .01512 L
.65597 .01512 L
Mistroke
.65742 .01512 L
.65863 .01512 L
.65993 .01512 L
.66131 .01512 L
.66259 .01512 L
.66381 .01512 L
.6645 .01512 L
.66515 .01512 L
.66646 .01512 L
.6672 .01512 L
.66787 .01512 L
.6691 .01512 L
.67041 .01512 L
.67164 .01512 L
.67276 .01512 L
.67534 .01512 L
.67678 .01512 L
.67815 .01512 L
.67957 .01512 L
.68087 .01512 L
.68156 .01512 L
.68231 .01512 L
.68309 .01512 L
.68383 .01512 L
.68507 .01512 L
.68577 .01512 L
.68643 .01512 L
.68762 .01512 L
.68889 .01512 L
.69015 .01512 L
.69132 .01512 L
.69238 .01512 L
.69353 .01512 L
.69617 .01512 L
.6975 .01512 L
.69896 .01512 L
.7002 .01512 L
.7009 .01512 L
.70154 .01512 L
.70278 .01512 L
.70395 .01512 L
.70509 .01512 L
.70632 .01512 L
.70748 .01512 L
.70855 .01512 L
.70973 .01512 L
.71102 .01512 L
.71239 .01512 L
.71362 .01512 L
.71486 .01512 L
Mistroke
.7162 .01512 L
.71761 .01512 L
.71825 .01512 L
.71895 .01512 L
.7202 .01512 L
.72088 .01512 L
.72152 .01512 L
.72266 .01512 L
.72389 .01512 L
.72512 .01512 L
.72626 .01512 L
.72749 .01512 L
.72814 .01512 L
.72884 .01512 L
.73001 .01512 L
.73111 .01512 L
.73227 .01512 L
.73353 .01512 L
.73576 .01512 L
.73698 .01512 L
.73811 .01512 L
.73918 .01512 L
.74015 .01512 L
.74127 .01512 L
.74232 .01512 L
.74356 .01512 L
.74474 .01512 L
.74539 .01512 L
.74609 .01512 L
.74733 .01512 L
.74851 .01512 L
.74977 .01512 L
.75203 .01512 L
.75335 .01512 L
.75459 .01512 L
.75571 .01512 L
.75692 .01512 L
.75757 .01512 L
.75829 .01512 L
.75903 .01512 L
.75973 .01512 L
.76097 .01512 L
.76167 .01512 L
.76231 .01512 L
.76345 .01512 L
.76467 .01512 L
.76572 .01512 L
.76685 .01512 L
.76806 .01512 L
.76919 .01512 L
Mistroke
.77043 .01512 L
.77178 .01512 L
.77288 .01512 L
.77406 .01512 L
.77531 .01512 L
.77646 .01512 L
.77762 .01512 L
.77871 .01512 L
.77969 .01512 L
.78075 .01512 L
.78199 .01512 L
.78311 .01512 L
.78441 .01512 L
.78565 .01512 L
.78678 .01512 L
.78784 .01512 L
.79022 .01512 L
.79159 .01512 L
.79287 .01512 L
.79403 .01512 L
.79527 .01512 L
.79592 .01512 L
.79663 .01512 L
.79738 .01512 L
.79807 .01512 L
.79931 .01512 L
.80001 .01512 L
.80064 .01512 L
.80195 .01512 L
.80261 .01512 L
.80334 .01512 L
.80462 .01512 L
.80583 .01512 L
.80733 .01512 L
.80877 .01512 L
.81016 .01512 L
.81146 .01512 L
.8126 .01512 L
.81381 .01512 L
.81451 .01512 L
.81516 .01512 L
.81638 .01512 L
.81703 .01512 L
.81771 .01512 L
.81893 .01512 L
.82024 .01512 L
.82099 .01512 L
.82169 .01512 L
.82295 .01512 L
.82358 .01512 L
Mistroke
.82428 .01512 L
.82552 .01512 L
.82669 .01512 L
.82931 .01512 L
.83078 .01512 L
.83213 .01512 L
.83332 .01512 L
.83443 .01512 L
.83565 .01512 L
.83695 .01512 L
.83761 .01512 L
.83832 .01512 L
.83961 .01512 L
.84087 .01512 L
.84203 .01512 L
.84309 .01512 L
.84424 .01512 L
.84632 .01512 L
.84758 .01512 L
.84878 .01512 L
.84996 .01512 L
.85104 .01512 L
.85218 .01512 L
.8534 .01512 L
.85454 .01512 L
.8556 .01512 L
.85685 .01512 L
.85799 .01512 L
.85925 .01512 L
.85988 .01512 L
.86058 .01512 L
.86189 .01512 L
.8631 .01512 L
.8644 .01512 L
.86583 .01512 L
.86824 .01512 L
.86956 .01512 L
.8708 .01512 L
.87194 .01512 L
.87314 .01512 L
.87417 .01512 L
.87528 .01512 L
.8765 .01512 L
.87779 .01512 L
.87901 .01512 L
.88011 .01512 L
.88142 .01512 L
.88208 .01512 L
.8828 .01512 L
.88528 .01512 L
Mistroke
.88668 .01512 L
.88818 .01512 L
.88959 .01512 L
.89088 .01512 L
.89218 .01512 L
.89338 .01512 L
.89469 .01512 L
.89536 .01512 L
.89609 .01512 L
.89732 .01512 L
.89801 .01512 L
.89864 .01512 L
.89981 .01512 L
.90104 .01512 L
.90338 .01512 L
.90462 .01512 L
.90593 .01512 L
.90708 .01512 L
.90834 .01512 L
.90948 .01512 L
.91056 .01512 L
.91125 .01512 L
.9119 .01512 L
.91313 .01512 L
.91445 .01512 L
.9152 .01512 L
.91589 .01512 L
.91712 .01512 L
.91824 .01512 L
.91953 .01512 L
.92074 .01512 L
.92298 .01512 L
.9242 .01512 L
.92533 .01512 L
.92735 .01512 L
.92842 .01512 L
.92956 .01512 L
.93079 .01512 L
.93148 .01512 L
.93212 .01512 L
.9333 .01512 L
.93455 .01512 L
.93566 .01512 L
.93671 .01512 L
.93786 .01512 L
.9391 .01512 L
.94124 .01512 L
.94327 .01512 L
.94439 .01512 L
.94561 .01512 L
Mistroke
.94662 .01512 L
.94773 .01512 L
.94896 .01512 L
.95027 .01512 L
.95148 .01512 L
.95262 .01512 L
.95376 .01512 L
.95481 .01512 L
.95602 .01512 L
.95717 .01512 L
.96158 .01512 L
.96274 .01512 L
.96399 .01512 L
.96518 .01512 L
.96627 .01512 L
.96758 .01512 L
.96825 .01512 L
.96897 .01512 L
.97024 .01512 L
.97142 .01512 L
.97262 .01512 L
.97372 .01512 L
.97499 .01512 L
.97619 .01512 L
Mfstroke
0 0 m
1 0 L
1 .61803 L
0 .61803 L
closepath
clip
newpath
% End of Graphics
MathPictureEnd
\
\>"], "Graphics",
  ImageSize->{288, 177.938},
  ImageMargins->{{43, 0}, {0, 0}},
  ImageRegion->{{0, 1}, {0, 1}},
  ImageCacheValid->False]
}, Open  ]]
}, Open  ]],

Cell["\<\
Now we can see whether the measurement errors for the different types of \
sample are the same:\
\>", "Text"],

Cell[CellGroupData[{

Cell[BoxData[
    \(\(graph = 
        Plot[{\[Sigma]PDFmData[\[Sigma]], \ \[Sigma]PDFeData[\[Sigma]], \
\[Sigma]PDFfData[\[Sigma]]}, {\[Sigma], min\[Sigma], max\[Sigma]}, 
          PlotRange \[Rule] {{0, max\[Sigma]}, All}, 
          Axes \[Rule] {True, False}, 
          AxesLabel \[Rule] {"\<P(\[Sigma])\>", None}];\)\)], "Input"],

Cell[GraphicsData["PostScript", "\<\
%!
%%Creator: Mathematica
%%AspectRatio: .61803 
MathPictureStart
/Mabs {
Mgmatrix idtransform
Mtmatrix dtransform
} bind def
/Mabsadd { Mabs
3 -1 roll add
3 1 roll add
exch } bind def
%% Graphics
%%IncludeResource: font Courier
%%IncludeFont: Courier
/Courier findfont 10  scalefont  setfont
% Scaling calculations
-1.20346e-017 28.5714 0.0149609 0.00193457 [
[0 .00246 -3 -9 ]
[0 .00246 3 0 ]
[.14286 .00246 -15 -9 ]
[.14286 .00246 15 0 ]
[.28571 .00246 -12 -9 ]
[.28571 .00246 12 0 ]
[.42857 .00246 -15 -9 ]
[.42857 .00246 15 0 ]
[.57143 .00246 -12 -9 ]
[.57143 .00246 12 0 ]
[.71429 .00246 -15 -9 ]
[.71429 .00246 15 0 ]
[.85714 .00246 -12 -9 ]
[.85714 .00246 12 0 ]
[1 .00246 -15 -9 ]
[1 .00246 15 0 ]
[1.025 .01496 0 -6.28125 ]
[1.025 .01496 28.125 6.28125 ]
[ 0 0 0 0 ]
[ 1 .61803 0 0 ]
] MathScale
% Start of Graphics
1 setlinecap
1 setlinejoin
newpath
0 g
.25 Mabswid
[ ] 0 setdash
0 .01496 m
0 .02121 L
s
[(0)] 0 .00246 0 1 Mshowa
.14286 .01496 m
.14286 .02121 L
s
[(0.005)] .14286 .00246 0 1 Mshowa
.28571 .01496 m
.28571 .02121 L
s
[(0.01)] .28571 .00246 0 1 Mshowa
.42857 .01496 m
.42857 .02121 L
s
[(0.015)] .42857 .00246 0 1 Mshowa
.57143 .01496 m
.57143 .02121 L
s
[(0.02)] .57143 .00246 0 1 Mshowa
.71429 .01496 m
.71429 .02121 L
s
[(0.025)] .71429 .00246 0 1 Mshowa
.85714 .01496 m
.85714 .02121 L
s
[(0.03)] .85714 .00246 0 1 Mshowa
1 .01496 m
1 .02121 L
s
[(0.035)] 1 .00246 0 1 Mshowa
.125 Mabswid
.02857 .01496 m
.02857 .01871 L
s
.05714 .01496 m
.05714 .01871 L
s
.08571 .01496 m
.08571 .01871 L
s
.11429 .01496 m
.11429 .01871 L
s
.17143 .01496 m
.17143 .01871 L
s
.2 .01496 m
.2 .01871 L
s
.22857 .01496 m
.22857 .01871 L
s
.25714 .01496 m
.25714 .01871 L
s
.31429 .01496 m
.31429 .01871 L
s
.34286 .01496 m
.34286 .01871 L
s
.37143 .01496 m
.37143 .01871 L
s
.4 .01496 m
.4 .01871 L
s
.45714 .01496 m
.45714 .01871 L
s
.48571 .01496 m
.48571 .01871 L
s
.51429 .01496 m
.51429 .01871 L
s
.54286 .01496 m
.54286 .01871 L
s
.6 .01496 m
.6 .01871 L
s
.62857 .01496 m
.62857 .01871 L
s
.65714 .01496 m
.65714 .01871 L
s
.68571 .01496 m
.68571 .01871 L
s
.74286 .01496 m
.74286 .01871 L
s
.77143 .01496 m
.77143 .01871 L
s
.8 .01496 m
.8 .01871 L
s
.82857 .01496 m
.82857 .01871 L
s
.88571 .01496 m
.88571 .01871 L
s
.91429 .01496 m
.91429 .01871 L
s
.94286 .01496 m
.94286 .01871 L
s
.97143 .01496 m
.97143 .01871 L
s
.25 Mabswid
0 .01496 m
1 .01496 L
s
gsave
1.025 .01496 -61 -10.2813 Mabsadd m
1 1 Mabs scale
currentpoint translate
0 20.5625 translate 1 -1 scale
/g { setgray} bind def
/k { setcmykcolor} bind def
/p { gsave} bind def
/r { setrgbcolor} bind def
/w { setlinewidth} bind def
/C { curveto} bind def
/F { fill} bind def
/L { lineto} bind def
/rL { rlineto} bind def
/P { grestore} bind def
/s { stroke} bind def
/S { show} bind def
/N {currentpoint 3 -1 roll show moveto} bind def
/Msf { findfont exch scalefont [1 0 0 -1 0 0 ] makefont setfont} bind def
/m { moveto} bind def
/Mr { rmoveto} bind def
/Mx {currentpoint exch pop moveto} bind def
/My {currentpoint pop exch moveto} bind def
/X {0 rmoveto} bind def
/Y {0 exch rmoveto} bind def
/MISOfy
{
    /newfontname exch def
    /oldfontname exch def

    oldfontname findfont
    dup length dict begin
        {1 index /FID ne {def} {pop pop} ifelse} forall
        /Encoding WindowsANSIEncoding def
        currentdict
    end

    newfontname exch definefont pop
} def

63.000 12.813 moveto
%%IncludeResource: font Courier
%%IncludeFont: Courier
%%BeginResource: font Courier-MISO
%%BeginFont: Courier-MISO
/Courier /Courier-MISO MISOfy
%%EndFont
%%EndResource
%%IncludeResource: font Courier-MISO
%%IncludeFont: Courier-MISO
/Courier-MISO findfont 10.000 scalefont
[1 0 0 -1 0 0 ] makefont setfont
0.000 0.000 0.000 setrgbcolor
0.000 0.000 rmoveto
63.000 12.813 moveto
%%IncludeResource: font Courier-MISO
%%IncludeFont: Courier-MISO
/Courier-MISO findfont 10.000 scalefont
[1 0 0 -1 0 0 ] makefont setfont
0.000 0.000 0.000 setrgbcolor
(P) show
%%IncludeResource: font Mathematica2Mono
%%IncludeFont: Mathematica2Mono
/Mathematica2Mono findfont 10.000 scalefont
[1 0 0 -1 0 0 ] makefont setfont
0.000 0.000 0.000 setrgbcolor
69.000 12.813 moveto
(H) show
75.000 12.813 moveto
%%IncludeResource: font Mathematica1Mono
%%IncludeFont: Mathematica1Mono
/Mathematica1Mono findfont 10.000 scalefont
[1 0 0 -1 0 0 ] makefont setfont
0.000 0.000 0.000 setrgbcolor
(s) show
%%IncludeResource: font Mathematica2Mono
%%IncludeFont: Mathematica2Mono
/Mathematica2Mono findfont 10.000 scalefont
[1 0 0 -1 0 0 ] makefont setfont
0.000 0.000 0.000 setrgbcolor
81.125 12.813 moveto
(L) show
87.125 12.813 moveto
%%IncludeResource: font Courier-MISO
%%IncludeFont: Courier-MISO
/Courier-MISO findfont 10.000 scalefont
[1 0 0 -1 0 0 ] makefont setfont
0.000 0.000 0.000 setrgbcolor
0.000 0.000 rmoveto
1.000 setlinewidth
grestore
0 0 m
1 0 L
1 .61803 L
0 .61803 L
closepath
clip
newpath
.5 Mabswid
.14286 .01496 m
.14392 .01496 L
.14488 .01496 L
.14599 .01496 L
.14704 .01496 L
.14801 .01496 L
.14891 .01496 L
.14989 .01496 L
.15094 .01496 L
.15198 .01496 L
.15311 .01496 L
.15417 .01496 L
.15515 .01496 L
.15978 .01496 L
.16416 .01496 L
.16536 .01496 L
.16663 .01496 L
.16725 .01496 L
.16784 .01496 L
.16893 .01496 L
.16999 .01496 L
.17111 .01496 L
.17206 .01496 L
.17311 .01496 L
.17424 .01496 L
.17545 .01496 L
.17659 .01496 L
.17763 .01496 L
.17996 .01496 L
.18215 .01496 L
.18334 .01496 L
.18444 .01496 L
.18503 .01496 L
.18565 .01496 L
.18627 .01496 L
.18696 .01496 L
.18765 .01496 L
.18828 .01496 L
.189 .01496 L
.18969 .01496 L
.19032 .01496 L
.19091 .01496 L
.19223 .01496 L
.19335 .01496 L
.194 .01496 L
.19459 .01496 L
.19523 .01496 L
.1958 .01496 L
.1971 .01496 L
.1993 .01496 L
Mistroke
.2005 .01496 L
.20163 .01496 L
.20228 .01496 L
.20297 .01496 L
.20361 .01496 L
.20419 .01496 L
.20535 .01496 L
.20593 .01496 L
.20657 .01496 L
.20774 .01496 L
.20881 .01496 L
.21005 .01496 L
.21122 .01496 L
.2123 .01496 L
.21329 .01496 L
.21555 .01496 L
.21661 .01496 L
.21773 .01496 L
.21869 .01496 L
.21973 .01496 L
.22086 .01496 L
.2215 .01496 L
.22207 .01496 L
.22318 .01496 L
.22424 .01496 L
.22523 .01496 L
.22627 .01496 L
.22718 .01496 L
.22815 .01496 L
.22919 .01496 L
.23017 .01496 L
.23238 .01496 L
.23354 .01496 L
.23477 .01496 L
.23541 .01496 L
.23611 .01496 L
.23676 .01496 L
.23736 .01496 L
.23855 .01496 L
.23963 .01496 L
.2402 .01496 L
.24083 .01496 L
.24148 .01496 L
.24208 .01496 L
.24324 .01496 L
.24432 .01496 L
.2453 .01496 L
.24636 .01496 L
.24752 .01496 L
.24874 .01496 L
Mistroke
.25094 .01496 L
.25202 .01496 L
.25321 .01496 L
.25433 .01496 L
.25537 .01496 L
.25639 .01496 L
.25733 .01496 L
.2584 .01496 L
.25942 .01496 L
.26053 .01496 L
.2617 .01496 L
.2627 .01496 L
.2638 .01496 L
.26627 .01496 L
.26736 .01496 L
.26853 .01496 L
.26963 .01496 L
.27065 .01496 L
.27162 .01496 L
.27265 .01496 L
.27373 .01496 L
.27474 .01496 L
.27585 .01496 L
.27648 .01496 L
.27705 .01496 L
.27891 .01496 L
.27995 .01496 L
.28093 .01496 L
.28291 .01496 L
.28501 .01496 L
.28613 .01496 L
.28673 .01496 L
.28737 .01496 L
.2885 .01496 L
.28956 .01496 L
.29019 .01496 L
.29088 .01496 L
.29153 .01496 L
.29213 .01496 L
.29327 .01496 L
.29391 .01496 L
.29449 .01496 L
.29557 .01496 L
.2967 .01496 L
.2973 .01496 L
.29795 .01496 L
.2991 .01496 L
.30137 .01496 L
.30343 .01496 L
.30446 .01496 L
Mistroke
.30558 .01496 L
.30664 .01496 L
.30762 .01496 L
.30865 .01496 L
.30979 .01496 L
.31098 .01496 L
.31209 .01496 L
.31313 .01496 L
.31412 .01496 L
.31501 .01496 L
.31598 .01496 L
.31816 .01496 L
.32017 .01496 L
.32128 .01496 L
.32246 .01496 L
.32364 .01496 L
.32432 .01496 L
.32494 .01496 L
.32608 .01496 L
.32712 .01496 L
.32769 .01496 L
.32831 .01496 L
.32945 .01496 L
.33045 .01496 L
.33156 .01496 L
.33273 .01496 L
.33382 .01496 L
.33575 .01496 L
.33677 .01496 L
.33786 .01496 L
.33849 .01496 L
.33906 .01496 L
.34017 .01496 L
.34077 .01496 L
.34142 .01496 L
.3426 .01496 L
.3437 .01496 L
.34486 .01496 L
.34585 .01496 L
.34694 .01496 L
.3476 .01496 L
.34822 .01496 L
.34938 .01496 L
.35074 .01496 L
.352 .01496 L
.3531 .01496 L
.35427 .01496 L
.35493 .01496 L
.35556 .01496 L
.35674 .01496 L
Mistroke
.35778 .01496 L
.35891 .01496 L
.35997 .01496 L
.36093 .01496 L
.36207 .01496 L
.3633 .01496 L
.36446 .01497 L
.36554 .01497 L
.36665 .01497 L
.3673 .01497 L
.36788 .01496 L
.36845 .01496 L
.36908 .01496 L
.36971 .01496 L
.37037 .01496 L
.37149 .01496 L
.37211 .01496 L
.37268 .01496 L
.37379 .01497 L
.37483 .01498 L
.3758 .01498 L
.37685 .015 L
.37899 .01503 L
.38097 .01507 L
.38282 .01511 L
.38394 .01512 L
.38499 .01513 L
.38609 .01515 L
.38668 .01516 L
.38731 .01517 L
.38836 .01521 L
.38948 .01525 L
.39147 .01535 L
.39361 .0155 L
.39596 .01572 L
.40085 .01637 L
.40308 .0167 L
.40546 .01718 L
.40771 .01775 L
.40975 .0184 L
.41387 .02013 L
.41833 .02272 L
.42255 .02593 L
.42644 .02981 L
.43064 .03514 L
.43515 .04244 L
.4433 .06058 L
.453 .09096 L
.46187 .12845 L
.4804 .22931 L
Mistroke
.49761 .33059 L
.50618 .37429 L
.51425 .40718 L
.51872 .42148 L
.52107 .42757 L
.52356 .43278 L
.52565 .4364 L
.52795 .43955 L
.52896 .44067 L
.53004 .44168 L
.53105 .44245 L
.53199 .44303 L
.53309 .44352 L
.53367 .4437 L
.5343 .44383 L
.53492 .4439 L
.53558 .44391 L
.53675 .44375 L
.53784 .44332 L
.53885 .44269 L
.54115 .44069 L
.54368 .4376 L
.54597 .43401 L
.55111 .42342 L
.56043 .39625 L
.56922 .36347 L
.60385 .21553 L
.62139 .15202 L
.63069 .12449 L
.64068 .09962 L
.65026 .08024 L
.65901 .06585 L
.66791 .05408 L
.67615 .04537 L
.68514 .03787 L
.69328 .03258 L
.70232 .02801 L
.71195 .02438 L
.72099 .02185 L
.72931 .0201 L
.73843 .01867 L
.74806 .01757 L
.75662 .01687 L
.76577 .01632 L
.77442 .01594 L
.78229 .01569 L
.79124 .01548 L
.7995 .01534 L
.80858 .01522 L
.81316 .01518 L
Mistroke
.8182 .01514 L
.82731 .01509 L
.83565 .01505 L
.84026 .01504 L
.84528 .01502 L
.85444 .015 L
.85921 .015 L
.86371 .01499 L
.87213 .01498 L
.87685 .01498 L
.88119 .01498 L
.88592 .01497 L
.891 .01497 L
.89975 .01497 L
.90792 .01497 L
.91291 .01496 L
.91764 .01496 L
.92186 .01496 L
.92651 .01496 L
.93519 .01496 L
.93995 .01496 L
.94442 .01496 L
.95239 .01496 L
.96099 .01496 L
.96544 .01496 L
.96959 .01496 L
.97452 .01496 L
.97901 .01496 L
.98818 .01496 L
.99799 .01496 L
1 .01496 L
Mfstroke
.14286 .01496 m
.14392 .01496 L
.14488 .01496 L
.14599 .01496 L
.14704 .01496 L
.14801 .01496 L
.14891 .01496 L
.14989 .01496 L
.15094 .01496 L
.15198 .01496 L
.15311 .01496 L
.15417 .01496 L
.15515 .01496 L
.15978 .01496 L
.16416 .01496 L
.16536 .01496 L
.16663 .01496 L
.16725 .01496 L
.16784 .01496 L
.16893 .01496 L
.16999 .01496 L
.17111 .01496 L
.17206 .01496 L
.17311 .01496 L
.17424 .01496 L
.17545 .01496 L
.17659 .01496 L
.17763 .01496 L
.17996 .01496 L
.18215 .01496 L
.18334 .01496 L
.18444 .01496 L
.18503 .01496 L
.18565 .01496 L
.18627 .01496 L
.18696 .01496 L
.18765 .01496 L
.18828 .01496 L
.189 .01496 L
.18969 .01496 L
.19032 .01496 L
.19091 .01496 L
.19223 .01496 L
.19335 .01496 L
.194 .01496 L
.19459 .01496 L
.19523 .01496 L
.1958 .01496 L
.1971 .01496 L
.1993 .01496 L
Mistroke
.2005 .01496 L
.20163 .01496 L
.20228 .01496 L
.20297 .01496 L
.20361 .01496 L
.20419 .01496 L
.20535 .01496 L
.20593 .01496 L
.20657 .01496 L
.20774 .01496 L
.20881 .01496 L
.21005 .01496 L
.21122 .01496 L
.2123 .01496 L
.21329 .01496 L
.21555 .01496 L
.21661 .01496 L
.21773 .01496 L
.21869 .01496 L
.21973 .01496 L
.22086 .01496 L
.2215 .01496 L
.22207 .01496 L
.22318 .01496 L
.22424 .01496 L
.22523 .01496 L
.22627 .01496 L
.22718 .01496 L
.22815 .01496 L
.22919 .01496 L
.23017 .01496 L
.23238 .01496 L
.23354 .01496 L
.23477 .01496 L
.23541 .01496 L
.23611 .01496 L
.23676 .01496 L
.23736 .01496 L
.23855 .01496 L
.23963 .01496 L
.2402 .01496 L
.24083 .01496 L
.24148 .01496 L
.24208 .01496 L
.24324 .01496 L
.24432 .01496 L
.2453 .01496 L
.24636 .01496 L
.24752 .01496 L
.24874 .01496 L
Mistroke
.25094 .01496 L
.25202 .01496 L
.25321 .01496 L
.25433 .01496 L
.25537 .01496 L
.25639 .01496 L
.25733 .01496 L
.2584 .01496 L
.25942 .01496 L
.26053 .01496 L
.2617 .01496 L
.2627 .01496 L
.2638 .01496 L
.26627 .01496 L
.26736 .01496 L
.26853 .01496 L
.26963 .01496 L
.27065 .01496 L
.27162 .01496 L
.27265 .01496 L
.27373 .01496 L
.27474 .01496 L
.27585 .01496 L
.27648 .01496 L
.27705 .01496 L
.27891 .01496 L
.27995 .01496 L
.28093 .01496 L
.28291 .01496 L
.28501 .01496 L
.28613 .01496 L
.28673 .01496 L
.28737 .01496 L
.2885 .01496 L
.28956 .01496 L
.29019 .01496 L
.29088 .01496 L
.29153 .01496 L
.29213 .01496 L
.29327 .01496 L
.29449 .01496 L
.29565 .01496 L
.29626 .01496 L
.29691 .01496 L
.29809 .01496 L
.29918 .01496 L
.30343 .01495 L
.30448 .01495 L
.30559 .01495 L
.30617 .01495 L
Mistroke
.30681 .01495 L
.30793 .01496 L
.30899 .01496 L
.31013 .01496 L
.31121 .01496 L
.31219 .01496 L
.31314 .01496 L
.31415 .01497 L
.31525 .01496 L
.31628 .01495 L
.31733 .01495 L
.31832 .01494 L
.3192 .01494 L
.32017 .01494 L
.3212 .01494 L
.32233 .01494 L
.32352 .01495 L
.32462 .01496 L
.32566 .01497 L
.3266 .01499 L
.32873 .01504 L
.33311 .01513 L
.33369 .01513 L
.33431 .01514 L
.33543 .01516 L
.3366 .01519 L
.33727 .01522 L
.33789 .01525 L
.34003 .0154 L
.34111 .0155 L
.34229 .01563 L
.3444 .01594 L
.34637 .01632 L
.35055 .01727 L
.35238 .01777 L
.3544 .01848 L
.35661 .01946 L
.35895 .02078 L
.36132 .02247 L
.36387 .0247 L
.36849 .02996 L
.37281 .03659 L
.37729 .0456 L
.38155 .05645 L
.38953 .08487 L
.39818 .12621 L
.40739 .18383 L
.42394 .3065 L
.43322 .37501 L
.44324 .43665 L
Mistroke
.44785 .45921 L
.45036 .46971 L
.45271 .47784 L
.45685 .48855 L
.45905 .49263 L
.46017 .49429 L
.4614 .49578 L
.4626 .4969 L
.46372 .49766 L
.4649 .49815 L
.46556 .49829 L
.46617 .49833 L
.4672 .4982 L
.46832 .4978 L
.46949 .49686 L
.47058 .49567 L
.47311 .49192 L
.4754 .48739 L
.48055 .47367 L
.48502 .45814 L
.48987 .4379 L
.49866 .39465 L
.51623 .29791 L
.53553 .1995 L
.54438 .16214 L
.55388 .12807 L
.57103 .08236 L
.58016 .06508 L
.59011 .05075 L
.59951 .04066 L
.60821 .03371 L
.61686 .02854 L
.62498 .02494 L
.63389 .02201 L
.63891 .02075 L
.64351 .01978 L
.65231 .01833 L
.66051 .01738 L
.66951 .01662 L
.67455 .01631 L
.67913 .01607 L
.68348 .01588 L
.6881 .01572 L
.69637 .01549 L
.70097 .0154 L
.70527 .01532 L
.70996 .01526 L
.71508 .0152 L
.71992 .01515 L
.72442 .01512 L
Mistroke
.72908 .01509 L
.7333 .01507 L
.74137 .01504 L
.74998 .01501 L
.75437 .015 L
.759 .015 L
.7673 .01498 L
.77193 .01498 L
.77624 .01498 L
.78094 .01497 L
.78604 .01497 L
.79093 .01497 L
.79545 .01497 L
.79969 .01497 L
.80437 .01497 L
.81247 .01496 L
.82107 .01496 L
.8255 .01496 L
.83016 .01496 L
.83849 .01496 L
.84313 .01496 L
.84745 .01496 L
.85216 .01496 L
.85726 .01496 L
.86219 .01496 L
.86673 .01496 L
.87099 .01496 L
.87567 .01496 L
.8838 .01496 L
.88825 .01496 L
.89241 .01496 L
.89689 .01496 L
.90178 .01496 L
.90608 .01496 L
.91067 .01496 L
.91521 .01496 L
.91933 .01496 L
.92735 .01496 L
.93176 .01496 L
.9364 .01496 L
.94472 .01496 L
.94935 .01496 L
.95366 .01496 L
.95836 .01496 L
.96347 .01496 L
.96837 .01496 L
.9729 .01496 L
.97715 .01496 L
.98183 .01496 L
.98994 .01496 L
Mistroke
.99854 .01496 L
1 .01496 L
Mfstroke
.14286 .01496 m
.14392 .01496 L
.14488 .01496 L
.14599 .01496 L
.14704 .01496 L
.14801 .01496 L
.14891 .01496 L
.14989 .01496 L
.15094 .01496 L
.15198 .01496 L
.15311 .01496 L
.15417 .01496 L
.15515 .01496 L
.15978 .01496 L
.16416 .01496 L
.16536 .01496 L
.16663 .01496 L
.16725 .01496 L
.16784 .01496 L
.16893 .01496 L
.16999 .01496 L
.17111 .01496 L
.17206 .01496 L
.17311 .01496 L
.17424 .01496 L
.17545 .01496 L
.17659 .01496 L
.17763 .01496 L
.17996 .01496 L
.18215 .01496 L
.18334 .01496 L
.18444 .01496 L
.18503 .01496 L
.18565 .01496 L
.18627 .01496 L
.18696 .01496 L
.18765 .01496 L
.18828 .01496 L
.189 .01496 L
.18969 .01496 L
.19032 .01496 L
.19091 .01496 L
.19223 .01496 L
.19335 .01496 L
.194 .01496 L
.19459 .01496 L
.19523 .01495 L
.1958 .01495 L
.1971 .01494 L
.19824 .01494 L
Mistroke
.19945 .01493 L
.2006 .01492 L
.20163 .01492 L
.20227 .01492 L
.20285 .01492 L
.2035 .01492 L
.20417 .01492 L
.20531 .01492 L
.20596 .01492 L
.20657 .01493 L
.20773 .01494 L
.20884 .01495 L
.20984 .01496 L
.21091 .01497 L
.21206 .01494 L
.21313 .01488 L
.21429 .01482 L
.21555 .01477 L
.21667 .01474 L
.2177 .01472 L
.2188 .01472 L
.21996 .01473 L
.22106 .01477 L
.22208 .01483 L
.22301 .0149 L
.22401 .015 L
.22511 .01514 L
.22629 .01532 L
.22739 .01553 L
.22843 .01576 L
.2296 .01581 L
.23066 .01587 L
.23183 .01599 L
.2325 .0161 L
.23311 .01622 L
.23413 .01647 L
.23508 .01677 L
.23622 .01723 L
.23726 .01774 L
.23939 .01911 L
.24168 .02112 L
.24352 .02319 L
.24552 .02598 L
.24957 .03324 L
.25185 .03859 L
.25432 .04557 L
.25881 .06177 L
.26317 .08269 L
.2672 .10925 L
.27635 .18504 L
Mistroke
.28605 .2888 L
.29517 .39541 L
.30384 .48686 L
.30761 .52099 L
.31163 .55243 L
.31394 .56784 L
.31603 .57846 L
.31802 .58658 L
.32012 .5934 L
.32119 .5962 L
.32237 .59874 L
.32344 .60056 L
.32444 .60184 L
.32563 .60284 L
.3267 .60328 L
.3273 .60332 L
.32795 .60321 L
.32912 .60259 L
.33014 .60162 L
.33126 .60008 L
.33243 .59746 L
.33353 .59445 L
.3376 .57963 L
.34232 .55608 L
.34665 .52955 L
.3564 .45801 L
.37488 .31018 L
.38389 .2454 L
.39207 .19554 L
.40004 .15427 L
.40867 .11863 L
.41779 .08933 L
.42639 .06855 L
.43492 .05326 L
.44429 .04104 L
.44901 .03641 L
.45408 .03227 L
.45883 .02905 L
.46324 .02661 L
.47236 .02278 L
.47718 .02126 L
.48231 .01997 L
.4872 .01899 L
.49181 .01822 L
.5004 .01716 L
.50461 .01678 L
.50922 .01642 L
.51371 .01615 L
.51852 .01592 L
.52303 .01573 L
Mistroke
.52714 .0156 L
.53516 .0154 L
.53951 .01532 L
.54412 .01525 L
.55239 .01516 L
.55698 .01512 L
.56128 .01509 L
.56601 .01506 L
.57109 .01504 L
.57549 .01503 L
.58018 .01501 L
.58532 .015 L
.5901 .01499 L
.59498 .01499 L
.59958 .01498 L
.60818 .01497 L
.61236 .01497 L
.61696 .01497 L
.62144 .01497 L
.62624 .01497 L
.63074 .01497 L
.63484 .01496 L
.64286 .01496 L
.64719 .01496 L
.65178 .01496 L
.66003 .01496 L
.66461 .01496 L
.66891 .01496 L
.67359 .01496 L
.67871 .01496 L
.68756 .01496 L
.69238 .01496 L
.69687 .01496 L
.70492 .01496 L
.70943 .01496 L
.71352 .01496 L
.71788 .01496 L
.7225 .01496 L
.73078 .01496 L
.73538 .01496 L
.73969 .01496 L
.74438 .01496 L
.74949 .01496 L
.75435 .01496 L
.75885 .01496 L
.76352 .01496 L
.76774 .01496 L
.77582 .01496 L
.78442 .01496 L
.78882 .01496 L
Mistroke
.79346 .01496 L
.80177 .01496 L
.8064 .01496 L
.81071 .01496 L
.81541 .01496 L
.82052 .01496 L
.82542 .01496 L
.82994 .01496 L
.83419 .01496 L
.83886 .01496 L
.84697 .01496 L
.85557 .01496 L
.86001 .01496 L
.86468 .01496 L
.87301 .01496 L
.87766 .01496 L
.88199 .01496 L
.88669 .01496 L
.89179 .01496 L
.89673 .01496 L
.90128 .01496 L
.91023 .01496 L
.91837 .01496 L
.92697 .01496 L
.93548 .01496 L
.94461 .01496 L
.95323 .01496 L
.9611 .01496 L
.97001 .01496 L
.97825 .01496 L
.9873 .01496 L
.99692 .01496 L
1 .01496 L
Mfstroke
% End of Graphics
MathPictureEnd
\
\>"], "Graphics",
  ImageSize->{288, 177.938},
  ImageMargins->{{43, 0}, {0, 0}},
  ImageRegion->{{0, 1}, {0, 1}},
  ImageCacheValid->False]
}, Open  ]],

Cell["\<\
and we see that they are not (Peaks are fry, eggs, mothers from left to \
right.)\
\>", "Text"],

Cell["\<\
This function finds mean, median, mode, 95% confidence intervals on a \
probability density function. (Confidence interval is from 2.5th percentile \
to 97.5th percentile.)\
\>", "Text"],

Cell[BoxData[{
    \(\(stats[f_, min_, max_] := 
        Module[{answer, x, \[Mu]}, \[IndentingNewLine]Off[NIntegrate::nlim, 
            NIntegrate::slwcon, NIntegrate::ncvb, 
            FindMaximum::lstol]; \[IndentingNewLine]\[Mu] = 
            NIntegrate[
              x\ f[x], {x, min, 
                max}]; \[IndentingNewLine]answer = {{mean \[Rule] \[Mu]}, \
\[IndentingNewLine]FindRoot[
                NIntegrate[f[x], {x, min, median}] \[Equal] 
                  0.5, {median, \[Mu], min, 
                  max}], \[IndentingNewLine]\(FindMaximum[
                  f[mode], {mode, \[Mu], min, 
                    max}]\)\[LeftDoubleBracket]2\[RightDoubleBracket], \
\[IndentingNewLine]FindRoot[
                NIntegrate[f[x], {x, min, lower}] \[Equal] 
                  0.025, {lower, \[Mu], min, \ 
                  max}], \[IndentingNewLine]FindRoot[
                NIntegrate[f[x], {x, min, upper}] \[Equal] 
                  1 - 0.025, {upper, \[Mu], min, \ 
                  max}]\[IndentingNewLine]}; \[IndentingNewLine]On[
            NIntegrate::nlim, NIntegrate::slwcon, NIntegrate::ncvb, 
            FindMaximum::lstol]; \
\[IndentingNewLine]answer\[IndentingNewLine]];\)\), "\[IndentingNewLine]", 
    \(\(stats[f_InterpolatingFunction] := 
        stats[f, f\[LeftDoubleBracket]1, 1, 1\[RightDoubleBracket], 
          f\[LeftDoubleBracket]1, 1, 2\[RightDoubleBracket]];\)\)}], "Input"],

Cell["\<\
And here are those distribution statistics for mothers, eggs and fry:\
\>", "Text"],

Cell[CellGroupData[{

Cell[BoxData[{
    \(stats[\[Sigma]PDFmData]\), "\[IndentingNewLine]", 
    \(stats[\[Sigma]PDFeData]\), "\[IndentingNewLine]", 
    \(stats[\[Sigma]PDFfData]\)}], "Input"],

Cell[BoxData[
    \({{mean \[Rule] 0.01915203137573301`}, {median \[Rule] 
          0.019006119683073714`}, {mode \[Rule] 
          0.018736198395496187`}, {lower \[Rule] 
          0.01592590071922597`}, {upper \[Rule] 
          0.02322276222513306`}}\)], "Output"],

Cell[BoxData[
    \({{mean \[Rule] 0.016686347023614177`}, {median \[Rule] 
          0.01655508256444523`}, {mode \[Rule] 
          0.016315213355911337`}, {lower \[Rule] 
          0.013827607568595865`}, {upper \[Rule] 
          0.020310614714731702`}}\)], "Output"],

Cell[BoxData[
    \({{mean \[Rule] 0.01180280185969781`}, {median \[Rule] 
          0.011678493868741657`}, {mode \[Rule] 
          0.011451500260893666`}, {lower \[Rule] 
          0.009482016516623826`}, {upper \[Rule] 
          0.014873227842482472`}}\)], "Output"]
}, Open  ]],

Cell[TextData[{
  "Now we can move on to estimating N, the bottleneck genome number. (I use \
'n' instead of 'N' here as 'N' means something to ",
  StyleBox["Mathematica",
    FontSlant->"Italic"],
  ".\n\nNotation:\n",
  Cell[BoxData[
      \(TraditionalForm\`n\)]],
  " = bottleneck genome number \n",
  Cell[BoxData[
      \(TraditionalForm\`m\)]],
  " = the mother's actual heteroplasmy ratio\n",
  Cell[BoxData[
      \(TraditionalForm\`c\)]],
  " = the child's actual heteroplasmy ratio\n",
  Cell[BoxData[
      \(TraditionalForm\`M\)]],
  " = mother's measured heteroplasmy ratio (including measurement error)\n",
  Cell[BoxData[
      \(TraditionalForm\`C\)]],
  " = child's measured heteroplasmy ratio\n",
  Cell[BoxData[
      \(TraditionalForm\`\[Sigma]\_M\)]],
  " = measurement error in mother\n",
  Cell[BoxData[
      \(TraditionalForm\`\[Sigma]\_C\)]],
  "= measurement error in child\n",
  Cell[BoxData[
      \(TraditionalForm\`\[Sigma]\_d\^2\)]],
  " = 'drift variance' = ",
  Cell[BoxData[
      \(TraditionalForm\`E[\((m - c)\)^2]\)]],
  ", measuring the expected intergenerational change in heteroplasmy ratio\n\
",
  Cell[BoxData[
      \(TraditionalForm\`\[Sigma]\^2\)]],
  " = 'total variance' =  ",
  Cell[BoxData[
      \(TraditionalForm\`E[\((M - C)\)^2]\)]],
  ", measuring the expected intergenerational change in measured heteroplasmy \
ratio\n",
  Cell[BoxData[
      \(TraditionalForm\`\[Sigma]\&^\^2\)]],
  "= estimate of total variance (etc.)\n\nBy our model, the child's number of \
mutant genomes will be drawn from a binomial distribution of size ",
  Cell[BoxData[
      \(TraditionalForm\`n\)]],
  ". From the binomial distribution, the drift variance is ",
  Cell[BoxData[
      \(TraditionalForm\`\(\(\[Sigma]\_d\^2\)\(=\)\)\)]],
  Cell[BoxData[
      \(TraditionalForm\`\(m(1 - m)\)/n\)]],
  ", and except for small ",
  Cell[BoxData[
      \(TraditionalForm\`n\)]],
  ", we can take it to be a normal distribution. Similarly, we assume \
measurement errors are normally distributed, with zero mean. Given mother and \
child measurement variances ",
  Cell[BoxData[
      \(TraditionalForm\`\[Sigma]\_M\^2\)]],
  " and ",
  Cell[BoxData[
      \(TraditionalForm\`\[Sigma]\_C\^2\)]],
  ", the difference between mother and child measurement is distributed with \
mean of zero and variance ",
  Cell[BoxData[
      \(TraditionalForm\`\[Sigma]\^2 = \[Sigma]\_M\^2 + \[Sigma]\_C\^2 + \
\[Sigma]\_d\^2\)]],
  "(assuming independence between the measurement errors and the drift in \
genome number) . Hence we can calculate a likelihood of a ",
  Cell[BoxData[
      \(TraditionalForm\`\((M, C)\)\)]],
  " measurement pair for a given ",
  Cell[BoxData[
      \(TraditionalForm\`n\)]],
  " if we know (or assume) values for ",
  Cell[BoxData[
      \(TraditionalForm\`\[Sigma]\_M\^2\)]],
  " and ",
  Cell[BoxData[
      \(TraditionalForm\`\[Sigma]\_C\^2\)]],
  "."
}], "Text"],

Cell["\<\
This comes from equation 3 in the paper. <Check that equation number has not \
changed.> It takes the measurements from one mother and the measurements from \
one child (egg or fry).\
\>", "Text"],

Cell[BoxData[
    \(\(logLikelihoodDiff[n_, errM_, errC_, Mlist_List, Clist_List] := 
        Module[{meanM, meanC, vard, varM, varC}, \[IndentingNewLine]If[
            Length[Clist] \[Equal] 0\  || \ 
              Length[Mlist] \[Equal] 0, \[IndentingNewLine]Return[
              0], \[IndentingNewLine]meanM\  = \ 
              Mean[Mlist]; \[IndentingNewLine]meanC\  = \ 
              Mean[Clist]; \[IndentingNewLine]vard\  = \ 
              meanM\ \((1 - meanM)\)/n; \[IndentingNewLine]varM\  = \ 
              errM^2/Length[Mlist]; \[IndentingNewLine]varC\  = \ 
              errC^2/Length[Clist]; \[IndentingNewLine]Return[
              Log[normal[meanM - meanC, 0, 
                  varM + varC + 
                    vard]]]\[IndentingNewLine]]\[IndentingNewLine]];\)\)], \
"Input"],

Cell["\<\
This function adds up the log likelihoods for all children in a single \
family:\
\>", "Text"],

Cell[BoxData[
    \(\(logLikelihoodFamily[n_, errM_, errC_, 
          familyData_] := \[IndentingNewLine]Plus @@ 
          Table[logLikelihoodDiff[n, errM, errC, 
              familyData\[LeftDoubleBracket]1\[RightDoubleBracket], 
              familyData\[LeftDoubleBracket]i\[RightDoubleBracket]], {i, 2, 
              Length[familyData]}];\)\)], "Input"],

Cell["And this one adds the log likelihoods for each family:", "Text"],

Cell[BoxData[
    \(\(logLikelihood[n_, \ errM_, \ errC_, \ data_]\  := \ 
        Plus @@ Map[logLikelihoodFamily[n, errM, errC, #] &, 
            data];\)\)], "Input"],

Cell["\<\
For example, here is a plot of the log likelihoods of n if we assume 2% \
measurement error for both mother and child, and we combine both eggs and fry \
in a single analysis:\
\>", "Text"],

Cell[CellGroupData[{

Cell[BoxData[{
    \(nMin = 30; \ nMax = 150;\), "\[IndentingNewLine]", 
    \(\(Plot[logLikelihood[n, 0.02, 0.02, data], {n, nMin, nMax}, 
        PlotRange \[Rule] {{0, nMax}, All}];\)\)}], "Input"],

Cell[GraphicsData["PostScript", "\<\
%!
%%Creator: Mathematica
%%AspectRatio: .61803 
MathPictureStart
/Mabs {
Mgmatrix idtransform
Mtmatrix dtransform
} bind def
/Mabsadd { Mabs
3 -1 roll add
3 1 roll add
exch } bind def
%% Graphics
%%IncludeResource: font Courier
%%IncludeFont: Courier
/Courier findfont 10  scalefont  setfont
% Scaling calculations
-3.20924e-017 0.00666667 -4.48767 0.0165196 [
[.13333 .04273 -6 -9 ]
[.13333 .04273 6 0 ]
[.26667 .04273 -6 -9 ]
[.26667 .04273 6 0 ]
[.4 .04273 -6 -9 ]
[.4 .04273 6 0 ]
[.53333 .04273 -6 -9 ]
[.53333 .04273 6 0 ]
[.66667 .04273 -9 -9 ]
[.66667 .04273 9 0 ]
[.8 .04273 -9 -9 ]
[.8 .04273 9 0 ]
[.93333 .04273 -9 -9 ]
[.93333 .04273 9 0 ]
[-0.0125 .13783 -18 -4.5 ]
[-0.0125 .13783 0 4.5 ]
[-0.0125 .22043 -18 -4.5 ]
[-0.0125 .22043 0 4.5 ]
[-0.0125 .30303 -18 -4.5 ]
[-0.0125 .30303 0 4.5 ]
[-0.0125 .38562 -18 -4.5 ]
[-0.0125 .38562 0 4.5 ]
[-0.0125 .46822 -18 -4.5 ]
[-0.0125 .46822 0 4.5 ]
[-0.0125 .55082 -18 -4.5 ]
[-0.0125 .55082 0 4.5 ]
[ 0 0 0 0 ]
[ 1 .61803 0 0 ]
] MathScale
% Start of Graphics
1 setlinecap
1 setlinejoin
newpath
0 g
.25 Mabswid
[ ] 0 setdash
.13333 .05523 m
.13333 .06148 L
s
[(20)] .13333 .04273 0 1 Mshowa
.26667 .05523 m
.26667 .06148 L
s
[(40)] .26667 .04273 0 1 Mshowa
.4 .05523 m
.4 .06148 L
s
[(60)] .4 .04273 0 1 Mshowa
.53333 .05523 m
.53333 .06148 L
s
[(80)] .53333 .04273 0 1 Mshowa
.66667 .05523 m
.66667 .06148 L
s
[(100)] .66667 .04273 0 1 Mshowa
.8 .05523 m
.8 .06148 L
s
[(120)] .8 .04273 0 1 Mshowa
.93333 .05523 m
.93333 .06148 L
s
[(140)] .93333 .04273 0 1 Mshowa
.125 Mabswid
.03333 .05523 m
.03333 .05898 L
s
.06667 .05523 m
.06667 .05898 L
s
.1 .05523 m
.1 .05898 L
s
.16667 .05523 m
.16667 .05898 L
s
.2 .05523 m
.2 .05898 L
s
.23333 .05523 m
.23333 .05898 L
s
.3 .05523 m
.3 .05898 L
s
.33333 .05523 m
.33333 .05898 L
s
.36667 .05523 m
.36667 .05898 L
s
.43333 .05523 m
.43333 .05898 L
s
.46667 .05523 m
.46667 .05898 L
s
.5 .05523 m
.5 .05898 L
s
.56667 .05523 m
.56667 .05898 L
s
.6 .05523 m
.6 .05898 L
s
.63333 .05523 m
.63333 .05898 L
s
.7 .05523 m
.7 .05898 L
s
.73333 .05523 m
.73333 .05898 L
s
.76667 .05523 m
.76667 .05898 L
s
.83333 .05523 m
.83333 .05898 L
s
.86667 .05523 m
.86667 .05898 L
s
.9 .05523 m
.9 .05898 L
s
.96667 .05523 m
.96667 .05898 L
s
.25 Mabswid
0 .05523 m
1 .05523 L
s
0 .13783 m
.00625 .13783 L
s
[(280)] -0.0125 .13783 1 0 Mshowa
0 .22043 m
.00625 .22043 L
s
[(285)] -0.0125 .22043 1 0 Mshowa
0 .30303 m
.00625 .30303 L
s
[(290)] -0.0125 .30303 1 0 Mshowa
0 .38562 m
.00625 .38562 L
s
[(295)] -0.0125 .38562 1 0 Mshowa
0 .46822 m
.00625 .46822 L
s
[(300)] -0.0125 .46822 1 0 Mshowa
0 .55082 m
.00625 .55082 L
s
[(305)] -0.0125 .55082 1 0 Mshowa
.125 Mabswid
0 .07175 m
.00375 .07175 L
s
0 .08827 m
.00375 .08827 L
s
0 .10479 m
.00375 .10479 L
s
0 .12131 m
.00375 .12131 L
s
0 .15435 m
.00375 .15435 L
s
0 .17087 m
.00375 .17087 L
s
0 .18739 m
.00375 .18739 L
s
0 .20391 m
.00375 .20391 L
s
0 .23695 m
.00375 .23695 L
s
0 .25347 m
.00375 .25347 L
s
0 .26999 m
.00375 .26999 L
s
0 .28651 m
.00375 .28651 L
s
0 .31955 m
.00375 .31955 L
s
0 .33606 m
.00375 .33606 L
s
0 .35258 m
.00375 .35258 L
s
0 .3691 m
.00375 .3691 L
s
0 .40214 m
.00375 .40214 L
s
0 .41866 m
.00375 .41866 L
s
0 .43518 m
.00375 .43518 L
s
0 .4517 m
.00375 .4517 L
s
0 .48474 m
.00375 .48474 L
s
0 .50126 m
.00375 .50126 L
s
0 .51778 m
.00375 .51778 L
s
0 .5343 m
.00375 .5343 L
s
0 .03871 m
.00375 .03871 L
s
0 .02219 m
.00375 .02219 L
s
0 .00567 m
.00375 .00567 L
s
0 .56734 m
.00375 .56734 L
s
0 .58386 m
.00375 .58386 L
s
0 .60038 m
.00375 .60038 L
s
0 .6169 m
.00375 .6169 L
s
.25 Mabswid
0 0 m
0 .61803 L
s
0 0 m
1 0 L
1 .61803 L
0 .61803 L
closepath
clip
newpath
.5 Mabswid
.2 .01472 m
.23245 .15496 L
.26785 .27295 L
.30109 .35886 L
.33305 .42388 L
.36708 .478 L
.39984 .51818 L
.43465 .55038 L
.45209 .56305 L
.46819 .57292 L
.50046 .588 L
.51619 .59329 L
.52524 .59579 L
.53351 .59773 L
.54131 .59928 L
.54982 .60067 L
.55881 .60181 L
.56736 .60258 L
.57182 .60288 L
.57401 .60299 L
.57602 .60309 L
.57782 .60315 L
.5798 .60321 L
.58178 .60326 L
.58287 .60328 L
.58388 .6033 L
.58497 .60331 L
.58559 .60331 L
.58616 .60332 L
.58721 .60332 L
.58774 .60332 L
.58833 .60332 L
.58933 .60331 L
.59042 .6033 L
.59144 .60329 L
.59238 .60328 L
.5945 .60323 L
.59682 .60316 L
.6015 .60297 L
.60594 .60273 L
.61013 .60243 L
.61797 .60173 L
.62641 .60077 L
.63557 .59948 L
.65226 .59651 L
.66994 .59254 L
.70177 .58346 L
.73565 .57134 L
.76826 .55757 L
.80294 .54094 L
Mistroke
.83634 .52322 L
.86846 .50478 L
.90265 .48383 L
.93556 .46253 L
.97053 .43881 L
1 .41806 L
Mfstroke
% End of Graphics
MathPictureEnd
\
\>"], "Graphics",
  ImageSize->{288, 177.938},
  ImageMargins->{{43, 0}, {0, 0}},
  ImageRegion->{{0, 1}, {0, 1}},
  ImageCacheValid->False]
}, Open  ]],

Cell["\<\
For comparison, see what happens if we assume 1% measurement error instead:\
\>", "Text"],

Cell[CellGroupData[{

Cell[BoxData[
    \(\(Plot[logLikelihood[n, 0.01, 0.01, data], {n, nMin, nMax}, 
        PlotRange \[Rule] {{0, nMax}, All}];\)\)], "Input"],

Cell[GraphicsData["PostScript", "\<\
%!
%%Creator: Mathematica
%%AspectRatio: .61803 
MathPictureStart
/Mabs {
Mgmatrix idtransform
Mtmatrix dtransform
} bind def
/Mabsadd { Mabs
3 -1 roll add
3 1 roll add
exch } bind def
%% Graphics
%%IncludeResource: font Courier
%%IncludeFont: Courier
/Courier findfont 10  scalefont  setfont
% Scaling calculations
-3.20924e-017 0.00666667 -4.92467 0.017967 [
[.13333 .00375 -6 -9 ]
[.13333 .00375 6 0 ]
[.26667 .00375 -6 -9 ]
[.26667 .00375 6 0 ]
[.4 .00375 -6 -9 ]
[.4 .00375 6 0 ]
[.53333 .00375 -6 -9 ]
[.53333 .00375 6 0 ]
[.66667 .00375 -9 -9 ]
[.66667 .00375 9 0 ]
[.8 .00375 -9 -9 ]
[.8 .00375 9 0 ]
[.93333 .00375 -9 -9 ]
[.93333 .00375 9 0 ]
[-0.0125 .10609 -18 -4.5 ]
[-0.0125 .10609 0 4.5 ]
[-0.0125 .19592 -18 -4.5 ]
[-0.0125 .19592 0 4.5 ]
[-0.0125 .28576 -18 -4.5 ]
[-0.0125 .28576 0 4.5 ]
[-0.0125 .37559 -18 -4.5 ]
[-0.0125 .37559 0 4.5 ]
[-0.0125 .46543 -18 -4.5 ]
[-0.0125 .46543 0 4.5 ]
[-0.0125 .55526 -18 -4.5 ]
[-0.0125 .55526 0 4.5 ]
[ 0 0 0 0 ]
[ 1 .61803 0 0 ]
] MathScale
% Start of Graphics
1 setlinecap
1 setlinejoin
newpath
0 g
.25 Mabswid
[ ] 0 setdash
.13333 .01625 m
.13333 .0225 L
s
[(20)] .13333 .00375 0 1 Mshowa
.26667 .01625 m
.26667 .0225 L
s
[(40)] .26667 .00375 0 1 Mshowa
.4 .01625 m
.4 .0225 L
s
[(60)] .4 .00375 0 1 Mshowa
.53333 .01625 m
.53333 .0225 L
s
[(80)] .53333 .00375 0 1 Mshowa
.66667 .01625 m
.66667 .0225 L
s
[(100)] .66667 .00375 0 1 Mshowa
.8 .01625 m
.8 .0225 L
s
[(120)] .8 .00375 0 1 Mshowa
.93333 .01625 m
.93333 .0225 L
s
[(140)] .93333 .00375 0 1 Mshowa
.125 Mabswid
.03333 .01625 m
.03333 .02 L
s
.06667 .01625 m
.06667 .02 L
s
.1 .01625 m
.1 .02 L
s
.16667 .01625 m
.16667 .02 L
s
.2 .01625 m
.2 .02 L
s
.23333 .01625 m
.23333 .02 L
s
.3 .01625 m
.3 .02 L
s
.33333 .01625 m
.33333 .02 L
s
.36667 .01625 m
.36667 .02 L
s
.43333 .01625 m
.43333 .02 L
s
.46667 .01625 m
.46667 .02 L
s
.5 .01625 m
.5 .02 L
s
.56667 .01625 m
.56667 .02 L
s
.6 .01625 m
.6 .02 L
s
.63333 .01625 m
.63333 .02 L
s
.7 .01625 m
.7 .02 L
s
.73333 .01625 m
.73333 .02 L
s
.76667 .01625 m
.76667 .02 L
s
.83333 .01625 m
.83333 .02 L
s
.86667 .01625 m
.86667 .02 L
s
.9 .01625 m
.9 .02 L
s
.96667 .01625 m
.96667 .02 L
s
.25 Mabswid
0 .01625 m
1 .01625 L
s
0 .10609 m
.00625 .10609 L
s
[(280)] -0.0125 .10609 1 0 Mshowa
0 .19592 m
.00625 .19592 L
s
[(285)] -0.0125 .19592 1 0 Mshowa
0 .28576 m
.00625 .28576 L
s
[(290)] -0.0125 .28576 1 0 Mshowa
0 .37559 m
.00625 .37559 L
s
[(295)] -0.0125 .37559 1 0 Mshowa
0 .46543 m
.00625 .46543 L
s
[(300)] -0.0125 .46543 1 0 Mshowa
0 .55526 m
.00625 .55526 L
s
[(305)] -0.0125 .55526 1 0 Mshowa
.125 Mabswid
0 .03422 m
.00375 .03422 L
s
0 .05219 m
.00375 .05219 L
s
0 .07016 m
.00375 .07016 L
s
0 .08812 m
.00375 .08812 L
s
0 .12406 m
.00375 .12406 L
s
0 .14202 m
.00375 .14202 L
s
0 .15999 m
.00375 .15999 L
s
0 .17796 m
.00375 .17796 L
s
0 .21389 m
.00375 .21389 L
s
0 .23186 m
.00375 .23186 L
s
0 .24983 m
.00375 .24983 L
s
0 .26779 m
.00375 .26779 L
s
0 .30373 m
.00375 .30373 L
s
0 .32169 m
.00375 .32169 L
s
0 .33966 m
.00375 .33966 L
s
0 .35763 m
.00375 .35763 L
s
0 .39356 m
.00375 .39356 L
s
0 .41153 m
.00375 .41153 L
s
0 .4295 m
.00375 .4295 L
s
0 .44746 m
.00375 .44746 L
s
0 .4834 m
.00375 .4834 L
s
0 .50136 m
.00375 .50136 L
s
0 .51933 m
.00375 .51933 L
s
0 .5373 m
.00375 .5373 L
s
0 .57323 m
.00375 .57323 L
s
0 .5912 m
.00375 .5912 L
s
0 .60917 m
.00375 .60917 L
s
.25 Mabswid
0 0 m
0 .61803 L
s
0 0 m
1 0 L
1 .61803 L
0 .61803 L
closepath
clip
newpath
.5 Mabswid
.2 .01472 m
.23245 .16865 L
.26785 .29692 L
.30109 .38886 L
.33305 .45684 L
.36708 .51147 L
.39984 .54984 L
.41773 .56576 L
.43465 .5779 L
.45143 .58737 L
.46692 .59402 L
.48265 .59885 L
.49159 .60078 L
.49997 .60209 L
.50414 .60256 L
.50634 .60276 L
.50869 .60294 L
.51095 .60308 L
.51299 .60318 L
.51398 .60322 L
.51504 .60325 L
.51605 .60328 L
.51698 .6033 L
.51788 .60331 L
.51885 .60332 L
.51976 .60332 L
.52059 .60332 L
.52156 .60331 L
.52262 .60329 L
.52362 .60327 L
.52455 .60324 L
.52639 .60318 L
.52842 .60308 L
.53254 .60281 L
.53667 .60243 L
.54102 .60193 L
.54879 .60077 L
.55716 .59915 L
.56631 .59694 L
.58278 .5919 L
.60038 .58505 L
.63524 .56742 L
.66883 .5458 L
.70114 .52118 L
.73551 .49131 L
.76861 .45931 L
.80043 .42583 L
.83432 .38755 L
.86693 .34837 L
.9016 .30443 L
Mistroke
.935 .26006 L
.96713 .21566 L
1 .16862 L
Mfstroke
% End of Graphics
MathPictureEnd
\
\>"], "Graphics",
  ImageSize->{288, 177.938},
  ImageMargins->{{43, 0}, {0, 0}},
  ImageRegion->{{0, 1}, {0, 1}},
  ImageCacheValid->False]
}, Open  ]],

Cell[TextData[{
  "Because less of the difference between mother and child measurements is \
attributable to measurement error, the genetic drift must be greater hence n \
must be smaller - the peak shifts from about 85 to about 75.\n\nWe now want \
to eliminate the measurement uncertainties. We form a three dimensional grid \
over the plausible values of ",
  Cell[BoxData[
      \(TraditionalForm\`n\)]],
  ",  ",
  Cell[BoxData[
      \(TraditionalForm\`\[Sigma]\_M\)]],
  " and ",
  Cell[BoxData[
      \(TraditionalForm\`\[Sigma]\_C\)]],
  ". At each point we evaluate the overall likelihood (likelihood of ",
  Cell[BoxData[
      \(TraditionalForm\`\((n, \[Sigma]\_M, \[Sigma]\_C)\)\)]],
  " times likelihood of ",
  Cell[BoxData[
      \(TraditionalForm\`\[Sigma]\_M\)]],
  " times likelihood of ",
  Cell[BoxData[
      \(TraditionalForm\`\[Sigma]\_C\)]],
  ".)  The likelihoods of  ",
  Cell[BoxData[
      \(TraditionalForm\`\[Sigma]\_M\)]],
  " and ",
  Cell[BoxData[
      \(TraditionalForm\`\[Sigma]\_C\)]],
  " come from the interpolated functions we generated earlier. \n\nThis \
function returns the grid of log likelihoods:"
}], "Text"],

Cell[BoxData[
    \(\(logLikelihoodGrid[logErrMInterp_, logErrCInterp_, data_] := 
        Table[{n, errM, errC, 
            logLikelihood[n, errM, errC, data] + logErrMInterp[errM] + 
              logErrCInterp[errC]}, {n, nMin, 
            nMax, \((nMax - nMin)\)/40}, {errM, min\[Sigma], 
            max\[Sigma], \((max\[Sigma] - min\[Sigma])\)/40}, {errC, 
            min\[Sigma], 
            max\[Sigma], \((max\[Sigma] - min\[Sigma])\)/40}];\)\)], "Input"],

Cell["\<\
And this function creates a (3D) interpolating function using the grid \
points:\
\>", "Text"],

Cell[BoxData[
    \(interpolateLogLikelihood[logErrMInterp_, logErrCInterp_, data_] := 
      Module[{grid, peak}, \[IndentingNewLine]grid\  = \ 
          Flatten[logLikelihoodGrid[logErrMInterp, logErrCInterp, data], 
            2]; \[IndentingNewLine]peak\  = \ 
          Max[grid\[LeftDoubleBracket]All, 
              4\[RightDoubleBracket]]; \[IndentingNewLine]grid\  = \ 
          Map[# - {0, 0, 0, peak} &, grid]; \[IndentingNewLine]Return[
          Interpolation[grid]];\[IndentingNewLine]]\)], "Input"],

Cell["\<\
It takes about 10 minutes to calculate these. (These timings are on an Intel \
E7300 2.66GHz CPU, a recent mid-range processor.)
This is for the mother-plus-eggs data:\
\>", "Text"],

Cell[CellGroupData[{

Cell[BoxData[
    \(Timing[\(logInterp3Dme\  = \ 
          interpolateLogLikelihood[\[Sigma]LogPDFmData, \[Sigma]LogPDFeData, 
            meData];\)]\)], "Input"],

Cell[BoxData[
    \({461.295`\ Second, Null}\)], "Output"]
}, Open  ]],

Cell["And this is the mother-plus-fry data:", "Text"],

Cell[CellGroupData[{

Cell[BoxData[
    \(Timing[\(logInterp3Dmf\  = \ 
          interpolateLogLikelihood[\[Sigma]LogPDFmData, \[Sigma]LogPDFfData, 
            mfData];\)]\)], "Input"],

Cell[BoxData[
    \({382.23299999999995`\ Second, Null}\)], "Output"]
}, Open  ]],

Cell["\<\
And now we can integrate over the nuisance variables: (Warning messages are \
because the integrand is very small over most of the range.)\
\>", "Text"],

Cell[BoxData[
    \(\(integrateOverError[n_, logInterp3D_] := 
        NIntegrate[
          Exp[logInterp3D[n, errM, errC]], {errM, min\[Sigma], 
            max\[Sigma]}, {errC, min\[Sigma], max\[Sigma]}];\)\)], "Input"],

Cell[CellGroupData[{

Cell[BoxData[
    \(Plot[integrateOverError[n, logInterp3Dme], {n, nMin, nMax}, 
      PlotRange \[Rule] All]\)], "Input"],

Cell[BoxData[
    RowBox[{\(NIntegrate::"slwcon"\), \(\(:\)\(\ \)\), "\<\"Numerical \
integration converging too slowly; suspect one of the following: singularity, \
value of the integration being 0, oscillatory integrand, or insufficient \
WorkingPrecision. If your integrand is oscillatory try using the option \
Method->Oscillatory in NIntegrate. \
\\!\\(\\*ButtonBox[\\\"More\[Ellipsis]\\\", ButtonStyle->\\\"RefGuideLinkText\
\\\", ButtonFrame->None, ButtonData:>\\\"NIntegrate::slwcon\\\"]\\)\"\>"}]], \
"Message"],

Cell[BoxData[
    RowBox[{\(NIntegrate::"slwcon"\), \(\(:\)\(\ \)\), "\<\"Numerical \
integration converging too slowly; suspect one of the following: singularity, \
value of the integration being 0, oscillatory integrand, or insufficient \
WorkingPrecision. If your integrand is oscillatory try using the option \
Method->Oscillatory in NIntegrate. \
\\!\\(\\*ButtonBox[\\\"More\[Ellipsis]\\\", ButtonStyle->\\\"RefGuideLinkText\
\\\", ButtonFrame->None, ButtonData:>\\\"NIntegrate::slwcon\\\"]\\)\"\>"}]], \
"Message"],

Cell[BoxData[
    RowBox[{\(NIntegrate::"slwcon"\), \(\(:\)\(\ \)\), "\<\"Numerical \
integration converging too slowly; suspect one of the following: singularity, \
value of the integration being 0, oscillatory integrand, or insufficient \
WorkingPrecision. If your integrand is oscillatory try using the option \
Method->Oscillatory in NIntegrate. \
\\!\\(\\*ButtonBox[\\\"More\[Ellipsis]\\\", ButtonStyle->\\\"RefGuideLinkText\
\\\", ButtonFrame->None, ButtonData:>\\\"NIntegrate::slwcon\\\"]\\)\"\>"}]], \
"Message"],

Cell[BoxData[
    RowBox[{\(General::"stop"\), \(\(:\)\(\ \)\), "\<\"Further output of \
\\!\\(NIntegrate :: \\\"slwcon\\\"\\) will be suppressed during this \
calculation. \\!\\(\\*ButtonBox[\\\"More\[Ellipsis]\\\", \
ButtonStyle->\\\"RefGuideLinkText\\\", ButtonFrame->None, \
ButtonData:>\\\"General::stop\\\"]\\)\"\>"}]], "Message"],

Cell[GraphicsData["PostScript", "\<\
%!
%%Creator: Mathematica
%%AspectRatio: .61803 
MathPictureStart
/Mabs {
Mgmatrix idtransform
Mtmatrix dtransform
} bind def
/Mabsadd { Mabs
3 -1 roll add
3 1 roll add
exch } bind def
%% Graphics
%%IncludeResource: font Courier
%%IncludeFont: Courier
/Courier findfont 10  scalefont  setfont
% Scaling calculations
-0.214286 0.00793651 0.0147151 32205.4 [
[.2619 .00222 -6 -9 ]
[.2619 .00222 6 0 ]
[.42063 .00222 -6 -9 ]
[.42063 .00222 6 0 ]
[.57937 .00222 -9 -9 ]
[.57937 .00222 9 0 ]
[.7381 .00222 -9 -9 ]
[.7381 .00222 9 0 ]
[.89683 .00222 -9 -9 ]
[.89683 .00222 9 0 ]
[.09067 .09523 -45 -6.25 ]
[.09067 .09523 0 6.25 ]
[.09067 .17574 -33 -6.25 ]
[.09067 .17574 0 6.25 ]
[.09067 .25626 -45 -6.25 ]
[.09067 .25626 0 6.25 ]
[.09067 .33677 -42 -4.5 ]
[.09067 .33677 0 4.5 ]
[.09067 .41728 -54 -4.5 ]
[.09067 .41728 0 4.5 ]
[.09067 .4978 -48 -4.5 ]
[.09067 .4978 0 4.5 ]
[.09067 .57831 -54 -4.5 ]
[.09067 .57831 0 4.5 ]
[ 0 0 0 0 ]
[ 1 .61803 0 0 ]
] MathScale
% Start of Graphics
1 setlinecap
1 setlinejoin
newpath
0 g
.25 Mabswid
[ ] 0 setdash
.2619 .01472 m
.2619 .02097 L
s
[(60)] .2619 .00222 0 1 Mshowa
.42063 .01472 m
.42063 .02097 L
s
[(80)] .42063 .00222 0 1 Mshowa
.57937 .01472 m
.57937 .02097 L
s
[(100)] .57937 .00222 0 1 Mshowa
.7381 .01472 m
.7381 .02097 L
s
[(120)] .7381 .00222 0 1 Mshowa
.89683 .01472 m
.89683 .02097 L
s
[(140)] .89683 .00222 0 1 Mshowa
.125 Mabswid
.14286 .01472 m
.14286 .01847 L
s
.18254 .01472 m
.18254 .01847 L
s
.22222 .01472 m
.22222 .01847 L
s
.30159 .01472 m
.30159 .01847 L
s
.34127 .01472 m
.34127 .01847 L
s
.38095 .01472 m
.38095 .01847 L
s
.46032 .01472 m
.46032 .01847 L
s
.5 .01472 m
.5 .01847 L
s
.53968 .01472 m
.53968 .01847 L
s
.61905 .01472 m
.61905 .01847 L
s
.65873 .01472 m
.65873 .01847 L
s
.69841 .01472 m
.69841 .01847 L
s
.77778 .01472 m
.77778 .01847 L
s
.81746 .01472 m
.81746 .01847 L
s
.85714 .01472 m
.85714 .01847 L
s
.06349 .01472 m
.06349 .01847 L
s
.02381 .01472 m
.02381 .01847 L
s
.93651 .01472 m
.93651 .01847 L
s
.97619 .01472 m
.97619 .01847 L
s
.25 Mabswid
0 .01472 m
1 .01472 L
s
.10317 .09523 m
.10942 .09523 L
s
gsave
.09067 .09523 -45 -4.25 Mabsadd m
1 1 Mabs scale
/Courier findfont 10 scalefont setfont
(2.5) show
/Math1Mono findfont 10 scalefont setfont
(\\264) show
/Courier findfont 10 scalefont setfont
(10) show
0 5.25 rmoveto
/Courier findfont 7.5 scalefont setfont
(-6) show
grestore
.10317 .17574 m
.10942 .17574 L
s
gsave
.09067 .17574 -33 -4.25 Mabsadd m
1 1 Mabs scale
/Courier findfont 10 scalefont setfont
(5) show
/Math1Mono findfont 10 scalefont setfont
(\\264) show
/Courier findfont 10 scalefont setfont
(10) show
0 5.25 rmoveto
/Courier findfont 7.5 scalefont setfont
(-6) show
grestore
.10317 .25626 m
.10942 .25626 L
s
gsave
.09067 .25626 -45 -4.25 Mabsadd m
1 1 Mabs scale
/Courier findfont 10 scalefont setfont
(7.5) show
/Math1Mono findfont 10 scalefont setfont
(\\264) show
/Courier findfont 10 scalefont setfont
(10) show
0 5.25 rmoveto
/Courier findfont 7.5 scalefont setfont
(-6) show
grestore
.10317 .33677 m
.10942 .33677 L
s
[(0.00001)] .09067 .33677 1 0 Mshowa
.10317 .41728 m
.10942 .41728 L
s
[(0.0000125)] .09067 .41728 1 0 Mshowa
.10317 .4978 m
.10942 .4978 L
s
[(0.000015)] .09067 .4978 1 0 Mshowa
.10317 .57831 m
.10942 .57831 L
s
[(0.0000175)] .09067 .57831 1 0 Mshowa
.125 Mabswid
.10317 .03082 m
.10692 .03082 L
s
.10317 .04692 m
.10692 .04692 L
s
.10317 .06302 m
.10692 .06302 L
s
.10317 .07913 m
.10692 .07913 L
s
.10317 .11133 m
.10692 .11133 L
s
.10317 .12743 m
.10692 .12743 L
s
.10317 .14354 m
.10692 .14354 L
s
.10317 .15964 m
.10692 .15964 L
s
.10317 .19184 m
.10692 .19184 L
s
.10317 .20795 m
.10692 .20795 L
s
.10317 .22405 m
.10692 .22405 L
s
.10317 .24015 m
.10692 .24015 L
s
.10317 .27236 m
.10692 .27236 L
s
.10317 .28846 m
.10692 .28846 L
s
.10317 .30456 m
.10692 .30456 L
s
.10317 .32067 m
.10692 .32067 L
s
.10317 .35287 m
.10692 .35287 L
s
.10317 .36897 m
.10692 .36897 L
s
.10317 .38508 m
.10692 .38508 L
s
.10317 .40118 m
.10692 .40118 L
s
.10317 .43338 m
.10692 .43338 L
s
.10317 .44949 m
.10692 .44949 L
s
.10317 .46559 m
.10692 .46559 L
s
.10317 .48169 m
.10692 .48169 L
s
.10317 .5139 m
.10692 .5139 L
s
.10317 .53 m
.10692 .53 L
s
.10317 .5461 m
.10692 .5461 L
s
.10317 .56221 m
.10692 .56221 L
s
.10317 .59441 m
.10692 .59441 L
s
.10317 .61051 m
.10692 .61051 L
s
.25 Mabswid
.10317 0 m
.10317 .61803 L
s
.5 Mabswid
.02381 .01472 m
.02605 .01472 L
.02846 .01472 L
.03072 .01472 L
.03279 .01472 L
.03521 .01472 L
.03784 .01472 L
.04032 .01472 L
.04262 .01472 L
.04498 .01472 L
.0472 .01472 L
.04963 .01472 L
.05224 .01472 L
.05497 .01472 L
.05757 .01472 L
.0599 .01472 L
.06244 .01472 L
.0653 .01472 L
.06799 .01472 L
.07302 .01472 L
.07584 .01472 L
.07844 .01472 L
.08128 .01472 L
.08429 .01472 L
.08671 .01472 L
.0893 .01472 L
.09396 .01473 L
.09682 .01473 L
.09952 .01473 L
.10458 .01474 L
.10917 .01476 L
.11423 .01477 L
.11952 .0148 L
.12449 .01483 L
.12911 .01488 L
.13335 .01493 L
.13801 .015 L
.14291 .01509 L
.14791 .01522 L
.15245 .01537 L
.1577 .0156 L
.16265 .01586 L
.17146 .01652 L
.17643 .01702 L
.18102 .01759 L
.18569 .01828 L
.19071 .01918 L
.19978 .0213 L
.21057 .02487 L
.22042 .02942 L
Mistroke
.23029 .03551 L
.23944 .04282 L
.24949 .053 L
.26018 .06669 L
.28163 .10434 L
.30182 .15328 L
.34042 .27978 L
.38147 .43393 L
.40194 .50219 L
.41192 .53057 L
.42101 .55284 L
.42982 .57079 L
.43938 .58599 L
.44463 .59234 L
.44948 .59692 L
.45412 .60015 L
.45646 .60136 L
.4578 .60191 L
.45904 .60235 L
.46027 .6027 L
.4614 .60295 L
.46264 .60315 L
.46333 .60323 L
.46397 .60328 L
.46527 .60332 L
.46646 .60328 L
.46777 .60315 L
.46843 .60305 L
.46916 .60291 L
.47147 .60231 L
.47276 .60186 L
.47395 .60137 L
.47842 .59891 L
.48355 .59492 L
.48914 .58921 L
.49929 .57541 L
.51904 .53766 L
.54004 .48571 L
.57776 .37792 L
.61793 .26631 L
.65659 .1784 L
.67621 .14299 L
.6977 .11121 L
.71843 .08683 L
.73729 .06934 L
.75687 .05516 L
.77782 .04367 L
.79698 .03582 L
.81777 .02954 L
.83762 .02519 L
Mistroke
.85865 .02191 L
.8782 .01974 L
.89651 .01829 L
.9069 .01766 L
.91677 .01715 L
.9353 .01642 L
.9449 .01613 L
.95512 .01588 L
.97351 .01552 L
.97619 .01548 L
Mfstroke
0 0 m
1 0 L
1 .61803 L
0 .61803 L
closepath
clip
newpath
% End of Graphics
MathPictureEnd
\
\>"], "Graphics",
  ImageSize->{288, 177.938},
  ImageMargins->{{43, 0}, {0, 0}},
  ImageRegion->{{0, 1}, {0, 1}},
  ImageCacheValid->False],

Cell[BoxData[
    TagBox[\(\[SkeletonIndicator]  Graphics  \[SkeletonIndicator]\),
      False,
      Editable->False]], "Output"]
}, Open  ]],

Cell[TextData[{
  "That is inconveniently slow, so once again we approximate with an \
interpolating function. This function automates the process, returning an \
interpolating function on ",
  Cell[BoxData[
      \(TraditionalForm\`n\)]],
  " only, normalized to integrate to one."
}], "Text"],

Cell[BoxData[
    \(\(normInterp[logInterp3D_] := 
        Module[{grid, interp, norm}, 
          grid\  = \ 
            Table[{n, integrateOverError[n, logInterp3D]}, {n, nMin, 
                nMax, \((nMax - nMin)\)/
                  100}]; \[IndentingNewLine]interp\  = \ 
            Interpolation[grid]; \[IndentingNewLine]norm\  = \ 
            NIntegrate[
              interp[n], {n, nMin, nMax}]; \[IndentingNewLine]grid\ \  = 
            grid\  . \ {{1, 0}, {0, 1/norm}}; \[IndentingNewLine]Return[
            Interpolation[grid]]\[IndentingNewLine]];\)\)], "Input"],

Cell[CellGroupData[{

Cell[BoxData[{
    \(\(interp1Dme\  = \ 
        normInterp[logInterp3Dme];\)\), "\[IndentingNewLine]", 
    \(\(interp1Dmf\  = \ normInterp[logInterp3Dmf];\)\)}], "Input"],

Cell[BoxData[
    RowBox[{\(NIntegrate::"slwcon"\), \(\(:\)\(\ \)\), "\<\"Numerical \
integration converging too slowly; suspect one of the following: singularity, \
value of the integration being 0, oscillatory integrand, or insufficient \
WorkingPrecision. If your integrand is oscillatory try using the option \
Method->Oscillatory in NIntegrate. \
\\!\\(\\*ButtonBox[\\\"More\[Ellipsis]\\\", ButtonStyle->\\\"RefGuideLinkText\
\\\", ButtonFrame->None, ButtonData:>\\\"NIntegrate::slwcon\\\"]\\)\"\>"}]], \
"Message"],

Cell[BoxData[
    RowBox[{\(NIntegrate::"slwcon"\), \(\(:\)\(\ \)\), "\<\"Numerical \
integration converging too slowly; suspect one of the following: singularity, \
value of the integration being 0, oscillatory integrand, or insufficient \
WorkingPrecision. If your integrand is oscillatory try using the option \
Method->Oscillatory in NIntegrate. \
\\!\\(\\*ButtonBox[\\\"More\[Ellipsis]\\\", ButtonStyle->\\\"RefGuideLinkText\
\\\", ButtonFrame->None, ButtonData:>\\\"NIntegrate::slwcon\\\"]\\)\"\>"}]], \
"Message"],

Cell[BoxData[
    RowBox[{\(NIntegrate::"slwcon"\), \(\(:\)\(\ \)\), "\<\"Numerical \
integration converging too slowly; suspect one of the following: singularity, \
value of the integration being 0, oscillatory integrand, or insufficient \
WorkingPrecision. If your integrand is oscillatory try using the option \
Method->Oscillatory in NIntegrate. \
\\!\\(\\*ButtonBox[\\\"More\[Ellipsis]\\\", ButtonStyle->\\\"RefGuideLinkText\
\\\", ButtonFrame->None, ButtonData:>\\\"NIntegrate::slwcon\\\"]\\)\"\>"}]], \
"Message"],

Cell[BoxData[
    RowBox[{\(General::"stop"\), \(\(:\)\(\ \)\), "\<\"Further output of \
\\!\\(NIntegrate :: \\\"slwcon\\\"\\) will be suppressed during this \
calculation. \\!\\(\\*ButtonBox[\\\"More\[Ellipsis]\\\", \
ButtonStyle->\\\"RefGuideLinkText\\\", ButtonFrame->None, \
ButtonData:>\\\"General::stop\\\"]\\)\"\>"}]], "Message"],

Cell[BoxData[
    RowBox[{\(NIntegrate::"ncvb"\), \(\(:\)\(\ \)\), "\<\"NIntegrate failed \
to converge to prescribed accuracy after \\!\\(13\\) recursive bisections in \
\\!\\(errM\\) near \\!\\({errM, errC}\\) = \\!\\({0.0155010986328125`, \
0.018125000000000002`}\\). \\!\\(\\*ButtonBox[\\\"More\[Ellipsis]\\\", \
ButtonStyle->\\\"RefGuideLinkText\\\", ButtonFrame->None, \
ButtonData:>\\\"NIntegrate::ncvb\\\"]\\)\"\>"}]], "Message"],

Cell[BoxData[
    RowBox[{\(NIntegrate::"slwcon"\), \(\(:\)\(\ \)\), "\<\"Numerical \
integration converging too slowly; suspect one of the following: singularity, \
value of the integration being 0, oscillatory integrand, or insufficient \
WorkingPrecision. If your integrand is oscillatory try using the option \
Method->Oscillatory in NIntegrate. \
\\!\\(\\*ButtonBox[\\\"More\[Ellipsis]\\\", ButtonStyle->\\\"RefGuideLinkText\
\\\", ButtonFrame->None, ButtonData:>\\\"NIntegrate::slwcon\\\"]\\)\"\>"}]], \
"Message"],

Cell[BoxData[
    RowBox[{\(NIntegrate::"slwcon"\), \(\(:\)\(\ \)\), "\<\"Numerical \
integration converging too slowly; suspect one of the following: singularity, \
value of the integration being 0, oscillatory integrand, or insufficient \
WorkingPrecision. If your integrand is oscillatory try using the option \
Method->Oscillatory in NIntegrate. \
\\!\\(\\*ButtonBox[\\\"More\[Ellipsis]\\\", ButtonStyle->\\\"RefGuideLinkText\
\\\", ButtonFrame->None, ButtonData:>\\\"NIntegrate::slwcon\\\"]\\)\"\>"}]], \
"Message"],

Cell[BoxData[
    RowBox[{\(NIntegrate::"slwcon"\), \(\(:\)\(\ \)\), "\<\"Numerical \
integration converging too slowly; suspect one of the following: singularity, \
value of the integration being 0, oscillatory integrand, or insufficient \
WorkingPrecision. If your integrand is oscillatory try using the option \
Method->Oscillatory in NIntegrate. \
\\!\\(\\*ButtonBox[\\\"More\[Ellipsis]\\\", ButtonStyle->\\\"RefGuideLinkText\
\\\", ButtonFrame->None, ButtonData:>\\\"NIntegrate::slwcon\\\"]\\)\"\>"}]], \
"Message"],

Cell[BoxData[
    RowBox[{\(General::"stop"\), \(\(:\)\(\ \)\), "\<\"Further output of \
\\!\\(NIntegrate :: \\\"slwcon\\\"\\) will be suppressed during this \
calculation. \\!\\(\\*ButtonBox[\\\"More\[Ellipsis]\\\", \
ButtonStyle->\\\"RefGuideLinkText\\\", ButtonFrame->None, \
ButtonData:>\\\"General::stop\\\"]\\)\"\>"}]], "Message"]
}, Open  ]],

Cell["\<\
Here are the two posterior distributions, plus statistics on the \
distributions.\
\>", "Text"],

Cell[CellGroupData[{

Cell[BoxData[{
    \(\(Plot[{interp1Dme[n], interp1Dmf[n]}, {n, nMin, nMax}, 
        PlotRange \[Rule] All];\)\), "\[IndentingNewLine]", 
    \(stats[interp1Dme]\), "\[IndentingNewLine]", 
    \(stats[interp1Dmf]\), "\[IndentingNewLine]", 
    \(\)}], "Input"],

Cell[GraphicsData["PostScript", "\<\
%!
%%Creator: Mathematica
%%AspectRatio: .61803 
MathPictureStart
/Mabs {
Mgmatrix idtransform
Mtmatrix dtransform
} bind def
/Mabsadd { Mabs
3 -1 roll add
3 1 roll add
exch } bind def
%% Graphics
%%IncludeResource: font Courier
%%IncludeFont: Courier
/Courier findfont 10  scalefont  setfont
% Scaling calculations
-0.214286 0.00793651 0.0147151 17.4941 [
[.2619 .00222 -6 -9 ]
[.2619 .00222 6 0 ]
[.42063 .00222 -6 -9 ]
[.42063 .00222 6 0 ]
[.57937 .00222 -9 -9 ]
[.57937 .00222 9 0 ]
[.7381 .00222 -9 -9 ]
[.7381 .00222 9 0 ]
[.89683 .00222 -9 -9 ]
[.89683 .00222 9 0 ]
[.09067 .10219 -30 -4.5 ]
[.09067 .10219 0 4.5 ]
[.09067 .18966 -24 -4.5 ]
[.09067 .18966 0 4.5 ]
[.09067 .27713 -30 -4.5 ]
[.09067 .27713 0 4.5 ]
[.09067 .3646 -24 -4.5 ]
[.09067 .3646 0 4.5 ]
[.09067 .45207 -30 -4.5 ]
[.09067 .45207 0 4.5 ]
[.09067 .53954 -24 -4.5 ]
[.09067 .53954 0 4.5 ]
[ 0 0 0 0 ]
[ 1 .61803 0 0 ]
] MathScale
% Start of Graphics
1 setlinecap
1 setlinejoin
newpath
0 g
.25 Mabswid
[ ] 0 setdash
.2619 .01472 m
.2619 .02097 L
s
[(60)] .2619 .00222 0 1 Mshowa
.42063 .01472 m
.42063 .02097 L
s
[(80)] .42063 .00222 0 1 Mshowa
.57937 .01472 m
.57937 .02097 L
s
[(100)] .57937 .00222 0 1 Mshowa
.7381 .01472 m
.7381 .02097 L
s
[(120)] .7381 .00222 0 1 Mshowa
.89683 .01472 m
.89683 .02097 L
s
[(140)] .89683 .00222 0 1 Mshowa
.125 Mabswid
.14286 .01472 m
.14286 .01847 L
s
.18254 .01472 m
.18254 .01847 L
s
.22222 .01472 m
.22222 .01847 L
s
.30159 .01472 m
.30159 .01847 L
s
.34127 .01472 m
.34127 .01847 L
s
.38095 .01472 m
.38095 .01847 L
s
.46032 .01472 m
.46032 .01847 L
s
.5 .01472 m
.5 .01847 L
s
.53968 .01472 m
.53968 .01847 L
s
.61905 .01472 m
.61905 .01847 L
s
.65873 .01472 m
.65873 .01847 L
s
.69841 .01472 m
.69841 .01847 L
s
.77778 .01472 m
.77778 .01847 L
s
.81746 .01472 m
.81746 .01847 L
s
.85714 .01472 m
.85714 .01847 L
s
.06349 .01472 m
.06349 .01847 L
s
.02381 .01472 m
.02381 .01847 L
s
.93651 .01472 m
.93651 .01847 L
s
.97619 .01472 m
.97619 .01847 L
s
.25 Mabswid
0 .01472 m
1 .01472 L
s
.10317 .10219 m
.10942 .10219 L
s
[(0.005)] .09067 .10219 1 0 Mshowa
.10317 .18966 m
.10942 .18966 L
s
[(0.01)] .09067 .18966 1 0 Mshowa
.10317 .27713 m
.10942 .27713 L
s
[(0.015)] .09067 .27713 1 0 Mshowa
.10317 .3646 m
.10942 .3646 L
s
[(0.02)] .09067 .3646 1 0 Mshowa
.10317 .45207 m
.10942 .45207 L
s
[(0.025)] .09067 .45207 1 0 Mshowa
.10317 .53954 m
.10942 .53954 L
s
[(0.03)] .09067 .53954 1 0 Mshowa
.125 Mabswid
.10317 .03221 m
.10692 .03221 L
s
.10317 .0497 m
.10692 .0497 L
s
.10317 .0672 m
.10692 .0672 L
s
.10317 .08469 m
.10692 .08469 L
s
.10317 .11968 m
.10692 .11968 L
s
.10317 .13717 m
.10692 .13717 L
s
.10317 .15467 m
.10692 .15467 L
s
.10317 .17216 m
.10692 .17216 L
s
.10317 .20715 m
.10692 .20715 L
s
.10317 .22464 m
.10692 .22464 L
s
.10317 .24214 m
.10692 .24214 L
s
.10317 .25963 m
.10692 .25963 L
s
.10317 .29462 m
.10692 .29462 L
s
.10317 .31211 m
.10692 .31211 L
s
.10317 .32961 m
.10692 .32961 L
s
.10317 .3471 m
.10692 .3471 L
s
.10317 .38209 m
.10692 .38209 L
s
.10317 .39958 m
.10692 .39958 L
s
.10317 .41708 m
.10692 .41708 L
s
.10317 .43457 m
.10692 .43457 L
s
.10317 .46956 m
.10692 .46956 L
s
.10317 .48706 m
.10692 .48706 L
s
.10317 .50455 m
.10692 .50455 L
s
.10317 .52204 m
.10692 .52204 L
s
.10317 .55703 m
.10692 .55703 L
s
.10317 .57453 m
.10692 .57453 L
s
.10317 .59202 m
.10692 .59202 L
s
.10317 .60951 m
.10692 .60951 L
s
.25 Mabswid
.10317 0 m
.10317 .61803 L
s
.5 Mabswid
.02381 .01472 m
.02846 .01472 L
.03068 .01472 L
.03279 .01472 L
.03527 .01472 L
.03754 .01472 L
.03997 .01472 L
.04262 .01472 L
.0452 .01472 L
.04762 .01472 L
.05015 .01472 L
.05293 .01472 L
.05528 .01472 L
.05751 .01472 L
.06009 .01472 L
.06244 .01472 L
.06505 .01472 L
.0675 .01472 L
.07033 .01472 L
.07289 .01472 L
.07755 .01472 L
.08018 .01472 L
.08259 .01472 L
.08769 .01472 L
.09058 .01472 L
.09328 .01473 L
.09874 .01473 L
.10179 .01474 L
.10458 .01474 L
.10939 .01475 L
.11449 .01477 L
.11885 .01479 L
.12366 .01481 L
.12882 .01485 L
.13437 .01491 L
.13962 .01499 L
.14443 .01508 L
.14916 .01519 L
.15423 .01535 L
.15901 .01554 L
.16335 .01575 L
.16846 .01606 L
.174 .01649 L
.17919 .017 L
.18405 .01759 L
.19351 .0191 L
.19853 .02014 L
.20393 .0215 L
.21492 .02514 L
.22497 .02974 L
Mistroke
.23484 .03575 L
.24399 .04288 L
.25468 .05341 L
.26473 .06578 L
.28529 .09943 L
.30391 .14017 L
.34251 .25174 L
.38357 .38543 L
.40403 .44368 L
.41402 .46762 L
.42311 .48624 L
.43191 .50107 L
.44147 .51339 L
.44672 .5184 L
.44903 .52021 L
.45158 .52192 L
.45381 .52318 L
.45621 .52429 L
.45754 .52478 L
.45875 .52517 L
.4599 .52547 L
.46113 .52573 L
.46242 .52592 L
.46363 .52604 L
.4648 .52609 L
.46589 .52608 L
.46706 .52601 L
.46835 .52587 L
.469 .52577 L
.4697 .52564 L
.47096 .52535 L
.47341 .5246 L
.47574 .52365 L
.48009 .52125 L
.48524 .51742 L
.49001 .51295 L
.50081 .49975 L
.51945 .46826 L
.54004 .42392 L
.58021 .32406 L
.61887 .23122 L
.65998 .15122 L
.68048 .12019 L
.69957 .09643 L
.71915 .07673 L
.73765 .06192 L
.75808 .0492 L
.77666 .04035 L
.79665 .03316 L
.81509 .0282 L
Mistroke
.83383 .02445 L
.85446 .02145 L
.87389 .01945 L
.89477 .01792 L
.90488 .01737 L
.91592 .01687 L
.92646 .01647 L
.93601 .01618 L
.95547 .01572 L
.96614 .01553 L
.97619 .01538 L
Mfstroke
.02381 .01472 m
.02846 .01472 L
.03068 .01472 L
.03279 .01472 L
.03527 .01472 L
.03754 .01472 L
.03997 .01472 L
.04262 .01472 L
.0452 .01472 L
.04762 .01472 L
.05015 .01472 L
.05293 .01472 L
.05528 .01472 L
.05751 .01472 L
.06009 .01472 L
.06244 .01472 L
.06505 .01472 L
.0675 .01472 L
.07033 .01472 L
.07289 .01473 L
.07755 .01473 L
.08018 .01474 L
.08259 .01474 L
.08769 .01476 L
.09058 .01477 L
.09328 .01478 L
.09874 .01481 L
.10179 .01484 L
.10458 .01486 L
.10939 .01492 L
.11449 .01501 L
.11885 .0151 L
.12366 .01525 L
.12882 .01545 L
.13437 .01573 L
.13962 .01609 L
.14443 .01652 L
.14916 .01704 L
.15423 .01774 L
.16335 .01948 L
.16893 .02092 L
.17419 .02259 L
.18405 .02676 L
.19377 .03251 L
.20406 .04083 L
.21285 .05014 L
.22252 .06313 L
.24196 .09946 L
.25288 .12644 L
.26286 .15537 L
Mistroke
.30262 .30492 L
.34086 .46487 L
.36057 .53257 L
.37159 .56187 L
.38156 .58203 L
.38645 .58954 L
.39161 .59572 L
.39601 .59955 L
.39851 .60113 L
.40084 .60222 L
.40214 .60266 L
.40282 .60285 L
.40355 .60302 L
.40418 .60313 L
.40488 .60323 L
.40611 .60332 L
.4073 .60331 L
.40859 .60319 L
.4098 .60298 L
.41091 .6027 L
.41221 .60227 L
.41342 .60177 L
.41616 .60029 L
.41883 .59838 L
.42168 .59585 L
.42702 .58977 L
.43195 .5827 L
.44306 .562 L
.46323 .51062 L
.50268 .38198 L
.54062 .25877 L
.56174 .20044 L
.58101 .15575 L
.6012 .11782 L
.61989 .09023 L
.63895 .0686 L
.6597 .05124 L
.67834 .04002 L
.68908 .03505 L
.69894 .03128 L
.71826 .02566 L
.72841 .02347 L
.73911 .0216 L
.74864 .02026 L
.75883 .01909 L
.77718 .01755 L
.78741 .01693 L
.79851 .01641 L
.80898 .01602 L
.81865 .01574 L
Mistroke
.82768 .01553 L
.83739 .01535 L
.84804 .0152 L
.85802 .01509 L
.86814 .015 L
.87917 .01493 L
.88959 .01488 L
.89927 .01484 L
.90984 .01481 L
.9198 .01479 L
.92875 .01477 L
.93841 .01476 L
.94718 .01475 L
.95679 .01474 L
.96683 .01473 L
.97619 .01473 L
Mfstroke
0 0 m
1 0 L
1 .61803 L
0 .61803 L
closepath
clip
newpath
% End of Graphics
MathPictureEnd
\
\>"], "Graphics",
  ImageSize->{288, 177.938},
  ImageMargins->{{43, 0}, {0, 0}},
  ImageRegion->{{0, 1}, {0, 1}},
  ImageCacheValid->False],

Cell[BoxData[
    \({{mean \[Rule] 88.36165495524673`}, {median \[Rule] 
          87.43520130431916`}, {mode \[Rule] 
          85.61014858392633`}, {lower \[Rule] 
          63.67646929119891`}, {upper \[Rule] 
          118.36700043862591`}}\)], "Output"],

Cell[BoxData[
    \({{mean \[Rule] 80.28485850751034`}, {median \[Rule] 
          79.59426614367453`}, {mode \[Rule] 
          78.22718342084575`}, {lower \[Rule] 
          58.68006650190595`}, {upper \[Rule] 
          105.82372976968365`}}\)], "Output"]
}, Open  ]],

Cell[TextData[{
  "The peak on the left is for the fry. The fry appear to have a lower ",
  Cell[BoxData[
      \(TraditionalForm\`n\)]],
  " value than the eggs, as would be expected if there were an additional \
genome number bottleneck between the egg and fry stages, but the degree of \
overlap between the distributions shows us that the difference is not \
significant. We can also demonstrate this explicitly:"
}], "Text"],

Cell[BoxData[
    \(\(differencePDF[diff_, fx_InterpolatingFunction, 
          fy_InterpolatingFunction] := \ 
        With[{xMin\  = \ fx\[LeftDoubleBracket]1, 1, 1\[RightDoubleBracket], 
            xMax\  = \ fx\[LeftDoubleBracket]1, 1, 2\[RightDoubleBracket], 
            yMin = fy\[LeftDoubleBracket]1, 1, 1\[RightDoubleBracket], 
            yMax = fy\[LeftDoubleBracket]1, 1, 2\[RightDoubleBracket]}, 
          NIntegrate[
            fx[x]*fy[x - diff], {x, Max[xMin, yMin + diff], 
              Min[xMax, yMax + diff]}]\[IndentingNewLine]];\)\)], "Input"],

Cell[CellGroupData[{

Cell[BoxData[
    \(\(Plot[
        differencePDF[diff, interp1Dme, interp1Dmf], {diff, \(-50\), 70}, 
        PlotRange \[Rule] All];\)\)], "Input"],

Cell[GraphicsData["PostScript", "\<\
%!
%%Creator: Mathematica
%%AspectRatio: .61803 
MathPictureStart
/Mabs {
Mgmatrix idtransform
Mtmatrix dtransform
} bind def
/Mabsadd { Mabs
3 -1 roll add
3 1 roll add
exch } bind def
%% Graphics
%%IncludeResource: font Courier
%%IncludeFont: Courier
/Courier findfont 10  scalefont  setfont
% Scaling calculations
0.420635 0.00793651 0.0112161 26.9376 [
[.10317 -0.00128 -9 -9 ]
[.10317 -0.00128 9 0 ]
[.2619 -0.00128 -9 -9 ]
[.2619 -0.00128 9 0 ]
[.57937 -0.00128 -6 -9 ]
[.57937 -0.00128 6 0 ]
[.7381 -0.00128 -6 -9 ]
[.7381 -0.00128 6 0 ]
[.89683 -0.00128 -6 -9 ]
[.89683 -0.00128 6 0 ]
[.40813 .1459 -30 -4.5 ]
[.40813 .1459 0 4.5 ]
[.40813 .28059 -24 -4.5 ]
[.40813 .28059 0 4.5 ]
[.40813 .41528 -30 -4.5 ]
[.40813 .41528 0 4.5 ]
[.40813 .54997 -24 -4.5 ]
[.40813 .54997 0 4.5 ]
[ 0 0 0 0 ]
[ 1 .61803 0 0 ]
] MathScale
% Start of Graphics
1 setlinecap
1 setlinejoin
newpath
0 g
.25 Mabswid
[ ] 0 setdash
.10317 .01122 m
.10317 .01747 L
s
[(-40)] .10317 -0.00128 0 1 Mshowa
.2619 .01122 m
.2619 .01747 L
s
[(-20)] .2619 -0.00128 0 1 Mshowa
.57937 .01122 m
.57937 .01747 L
s
[(20)] .57937 -0.00128 0 1 Mshowa
.7381 .01122 m
.7381 .01747 L
s
[(40)] .7381 -0.00128 0 1 Mshowa
.89683 .01122 m
.89683 .01747 L
s
[(60)] .89683 -0.00128 0 1 Mshowa
.125 Mabswid
.14286 .01122 m
.14286 .01497 L
s
.18254 .01122 m
.18254 .01497 L
s
.22222 .01122 m
.22222 .01497 L
s
.30159 .01122 m
.30159 .01497 L
s
.34127 .01122 m
.34127 .01497 L
s
.38095 .01122 m
.38095 .01497 L
s
.46032 .01122 m
.46032 .01497 L
s
.5 .01122 m
.5 .01497 L
s
.53968 .01122 m
.53968 .01497 L
s
.61905 .01122 m
.61905 .01497 L
s
.65873 .01122 m
.65873 .01497 L
s
.69841 .01122 m
.69841 .01497 L
s
.77778 .01122 m
.77778 .01497 L
s
.81746 .01122 m
.81746 .01497 L
s
.85714 .01122 m
.85714 .01497 L
s
.06349 .01122 m
.06349 .01497 L
s
.02381 .01122 m
.02381 .01497 L
s
.93651 .01122 m
.93651 .01497 L
s
.97619 .01122 m
.97619 .01497 L
s
.25 Mabswid
0 .01122 m
1 .01122 L
s
.42063 .1459 m
.42688 .1459 L
s
[(0.005)] .40813 .1459 1 0 Mshowa
.42063 .28059 m
.42688 .28059 L
s
[(0.01)] .40813 .28059 1 0 Mshowa
.42063 .41528 m
.42688 .41528 L
s
[(0.015)] .40813 .41528 1 0 Mshowa
.42063 .54997 m
.42688 .54997 L
s
[(0.02)] .40813 .54997 1 0 Mshowa
.125 Mabswid
.42063 .03815 m
.42438 .03815 L
s
.42063 .06509 m
.42438 .06509 L
s
.42063 .09203 m
.42438 .09203 L
s
.42063 .11897 m
.42438 .11897 L
s
.42063 .17284 m
.42438 .17284 L
s
.42063 .19978 m
.42438 .19978 L
s
.42063 .22672 m
.42438 .22672 L
s
.42063 .25365 m
.42438 .25365 L
s
.42063 .30753 m
.42438 .30753 L
s
.42063 .33447 m
.42438 .33447 L
s
.42063 .36141 m
.42438 .36141 L
s
.42063 .38834 m
.42438 .38834 L
s
.42063 .44222 m
.42438 .44222 L
s
.42063 .46916 m
.42438 .46916 L
s
.42063 .49609 m
.42438 .49609 L
s
.42063 .52303 m
.42438 .52303 L
s
.42063 .57691 m
.42438 .57691 L
s
.42063 .60384 m
.42438 .60384 L
s
.25 Mabswid
.42063 0 m
.42063 .61803 L
s
.5 Mabswid
.02381 .01505 m
.03279 .01584 L
.04262 .01686 L
.06244 .01959 L
.07298 .02147 L
.08426 .02391 L
.10458 .02961 L
.12589 .03789 L
.14603 .04847 L
.166 .06223 L
.18444 .07836 L
.22379 .12592 L
.26163 .19056 L
.30191 .27883 L
.34068 .37586 L
.38191 .47754 L
.4025 .52174 L
.42162 .55591 L
.4401 .58098 L
.45044 .59112 L
.45981 .59773 L
.46469 .60017 L
.46735 .60121 L
.46983 .602 L
.47196 .60252 L
.47423 .60294 L
.47553 .60311 L
.47676 .60322 L
.47786 .60329 L
.47906 .60332 L
.48034 .6033 L
.48155 .60325 L
.48224 .60319 L
.48287 .60313 L
.4843 .60295 L
.4856 .60274 L
.48701 .60245 L
.48987 .60168 L
.49238 .60082 L
.49505 .59969 L
.49988 .59714 L
.51012 .58958 L
.52122 .5782 L
.54137 .54987 L
.58229 .46878 L
.6217 .37501 L
.65958 .28502 L
.69992 .20086 L
.73875 .13676 L
.7585 .11089 L
Mistroke
.78002 .08756 L
.81979 .05605 L
.8395 .04504 L
.86048 .03596 L
.88193 .02896 L
.90212 .02404 L
.92224 .02039 L
.94072 .01788 L
.95764 .01615 L
.97619 .01472 L
Mfstroke
0 0 m
1 0 L
1 .61803 L
0 .61803 L
closepath
clip
newpath
% End of Graphics
MathPictureEnd
\
\>"], "Graphics",
  ImageSize->{288, 177.938},
  ImageMargins->{{43, 0}, {0, 0}},
  ImageRegion->{{0, 1}, {0, 1}},
  ImageCacheValid->False]
}, Open  ]],

Cell["And some stats on that distribution:", "Text"],

Cell[CellGroupData[{

Cell[BoxData[{
    \(\(diffInterpN\  = \ 
        Interpolation[
          Table[{diff, 
              differencePDF[diff, interp1Dme, interp1Dmf]}, {diff, \(-50\), 
              70, 1}]];\)\), "\[IndentingNewLine]", 
    \(stats[diffInterpN]\)}], "Input"],

Cell[BoxData[
    \({{mean \[Rule] 8.063784301753177`}, {median \[Rule] 
          7.880867958001677`}, {mode \[Rule] 
          7.392534178630241`}, {lower \[Rule] \(-27.306783587366834`\)}, \
{upper \[Rule] 45.33883098025369`}}\)], "Output"]
}, Open  ]],

Cell["\<\
The 95% confidence interval includes a difference of zero, so we cannot \
conclude that the two N values differ. The one-sided p-value is:\
\>", "Text"],

Cell[CellGroupData[{

Cell[BoxData[
    \(NIntegrate[diffInterpN[n], {n, \(-50\), 0}]\)], "Input"],

Cell[BoxData[
    \(0.3313256154454256`\)], "Output"]
}, Open  ]],

Cell["\<\
We can also apply this methodology to the \[Sigma] distributions. In \
particular, are the measurement errors for fry and eggs significantly \
different?\
\>", "Text"],

Cell[CellGroupData[{

Cell[BoxData[{
    \(\(diffInterp\[Sigma]\  = \ 
        Interpolation[
          Table[{diff, 
              differencePDF[
                diff, \[Sigma]PDFeData, \[Sigma]PDFfData]}, {diff, \
\(-0.005\), 0.015, 0.0002}]];\)\), "\[IndentingNewLine]", 
    \(\(Plot[
        diffInterp\[Sigma][d], {d, \(-0.005\), 
          0.015}];\)\), "\[IndentingNewLine]", 
    \(stats[diffInterp\[Sigma]]\)}], "Input"],

Cell[BoxData[
    RowBox[{\(NIntegrate::"slwcon"\), \(\(:\)\(\ \)\), "\<\"Numerical \
integration converging too slowly; suspect one of the following: singularity, \
value of the integration being 0, oscillatory integrand, or insufficient \
WorkingPrecision. If your integrand is oscillatory try using the option \
Method->Oscillatory in NIntegrate. \
\\!\\(\\*ButtonBox[\\\"More\[Ellipsis]\\\", ButtonStyle->\\\"RefGuideLinkText\
\\\", ButtonFrame->None, ButtonData:>\\\"NIntegrate::slwcon\\\"]\\)\"\>"}]], \
"Message"],

Cell[BoxData[
    RowBox[{\(NIntegrate::"ncvb"\), \(\(:\)\(\ \)\), "\<\"NIntegrate failed \
to converge to prescribed accuracy after \\!\\(7\\) recursive bisections in \
\\!\\(x\\) near \\!\\(x\\) = \\!\\(0.011542968750000002`\\). \
\\!\\(\\*ButtonBox[\\\"More\[Ellipsis]\\\", ButtonStyle->\\\"RefGuideLinkText\
\\\", ButtonFrame->None, ButtonData:>\\\"NIntegrate::ncvb\\\"]\\)\"\>"}]], \
"Message"],

Cell[BoxData[
    RowBox[{\(NIntegrate::"slwcon"\), \(\(:\)\(\ \)\), "\<\"Numerical \
integration converging too slowly; suspect one of the following: singularity, \
value of the integration being 0, oscillatory integrand, or insufficient \
WorkingPrecision. If your integrand is oscillatory try using the option \
Method->Oscillatory in NIntegrate. \
\\!\\(\\*ButtonBox[\\\"More\[Ellipsis]\\\", ButtonStyle->\\\"RefGuideLinkText\
\\\", ButtonFrame->None, ButtonData:>\\\"NIntegrate::slwcon\\\"]\\)\"\>"}]], \
"Message"],

Cell[BoxData[
    RowBox[{\(NIntegrate::"ncvb"\), \(\(:\)\(\ \)\), "\<\"NIntegrate failed \
to converge to prescribed accuracy after \\!\\(7\\) recursive bisections in \
\\!\\(x\\) near \\!\\(x\\) = \\!\\(0.0115953125`\\). \
\\!\\(\\*ButtonBox[\\\"More\[Ellipsis]\\\", ButtonStyle->\\\"RefGuideLinkText\
\\\", ButtonFrame->None, ButtonData:>\\\"NIntegrate::ncvb\\\"]\\)\"\>"}]], \
"Message"],

Cell[BoxData[
    RowBox[{\(NIntegrate::"ncvb"\), \(\(:\)\(\ \)\), "\<\"NIntegrate failed \
to converge to prescribed accuracy after \\!\\(7\\) recursive bisections in \
\\!\\(x\\) near \\!\\(x\\) = \\!\\(0.01422734375`\\). \
\\!\\(\\*ButtonBox[\\\"More\[Ellipsis]\\\", ButtonStyle->\\\"RefGuideLinkText\
\\\", ButtonFrame->None, ButtonData:>\\\"NIntegrate::ncvb\\\"]\\)\"\>"}]], \
"Message"],

Cell[BoxData[
    RowBox[{\(General::"stop"\), \(\(:\)\(\ \)\), "\<\"Further output of \
\\!\\(NIntegrate :: \\\"ncvb\\\"\\) will be suppressed during this \
calculation. \\!\\(\\*ButtonBox[\\\"More\[Ellipsis]\\\", \
ButtonStyle->\\\"RefGuideLinkText\\\", ButtonFrame->None, \
ButtonData:>\\\"General::stop\\\"]\\)\"\>"}]], "Message"],

Cell[BoxData[
    RowBox[{\(NIntegrate::"slwcon"\), \(\(:\)\(\ \)\), "\<\"Numerical \
integration converging too slowly; suspect one of the following: singularity, \
value of the integration being 0, oscillatory integrand, or insufficient \
WorkingPrecision. If your integrand is oscillatory try using the option \
Method->Oscillatory in NIntegrate. \
\\!\\(\\*ButtonBox[\\\"More\[Ellipsis]\\\", ButtonStyle->\\\"RefGuideLinkText\
\\\", ButtonFrame->None, ButtonData:>\\\"NIntegrate::slwcon\\\"]\\)\"\>"}]], \
"Message"],

Cell[BoxData[
    RowBox[{\(General::"stop"\), \(\(:\)\(\ \)\), "\<\"Further output of \
\\!\\(NIntegrate :: \\\"slwcon\\\"\\) will be suppressed during this \
calculation. \\!\\(\\*ButtonBox[\\\"More\[Ellipsis]\\\", \
ButtonStyle->\\\"RefGuideLinkText\\\", ButtonFrame->None, \
ButtonData:>\\\"General::stop\\\"]\\)\"\>"}]], "Message"],

Cell[GraphicsData["PostScript", "\<\
%!
%%Creator: Mathematica
%%AspectRatio: .61803 
MathPictureStart
/Mabs {
Mgmatrix idtransform
Mtmatrix dtransform
} bind def
/Mabsadd { Mabs
3 -1 roll add
3 1 roll add
exch } bind def
%% Graphics
%%IncludeResource: font Courier
%%IncludeFont: Courier
/Courier findfont 10  scalefont  setfont
% Scaling calculations
0.261905 47.6191 0.0147151 0.00307821 [
[.02381 .00222 -18 -9 ]
[.02381 .00222 18 0 ]
[.5 .00222 -15 -9 ]
[.5 .00222 15 0 ]
[.7381 .00222 -12 -9 ]
[.7381 .00222 12 0 ]
[.97619 .00222 -15 -9 ]
[.97619 .00222 15 0 ]
[.2494 .16863 -12 -4.5 ]
[.2494 .16863 0 4.5 ]
[.2494 .32254 -18 -4.5 ]
[.2494 .32254 0 4.5 ]
[.2494 .47645 -18 -4.5 ]
[.2494 .47645 0 4.5 ]
[ 0 0 0 0 ]
[ 1 .61803 0 0 ]
] MathScale
% Start of Graphics
1 setlinecap
1 setlinejoin
newpath
0 g
.25 Mabswid
[ ] 0 setdash
.02381 .01472 m
.02381 .02097 L
s
[(-0.005)] .02381 .00222 0 1 Mshowa
.5 .01472 m
.5 .02097 L
s
[(0.005)] .5 .00222 0 1 Mshowa
.7381 .01472 m
.7381 .02097 L
s
[(0.01)] .7381 .00222 0 1 Mshowa
.97619 .01472 m
.97619 .02097 L
s
[(0.015)] .97619 .00222 0 1 Mshowa
.125 Mabswid
.07143 .01472 m
.07143 .01847 L
s
.11905 .01472 m
.11905 .01847 L
s
.16667 .01472 m
.16667 .01847 L
s
.21429 .01472 m
.21429 .01847 L
s
.30952 .01472 m
.30952 .01847 L
s
.35714 .01472 m
.35714 .01847 L
s
.40476 .01472 m
.40476 .01847 L
s
.45238 .01472 m
.45238 .01847 L
s
.54762 .01472 m
.54762 .01847 L
s
.59524 .01472 m
.59524 .01847 L
s
.64286 .01472 m
.64286 .01847 L
s
.69048 .01472 m
.69048 .01847 L
s
.78571 .01472 m
.78571 .01847 L
s
.83333 .01472 m
.83333 .01847 L
s
.88095 .01472 m
.88095 .01847 L
s
.92857 .01472 m
.92857 .01847 L
s
.25 Mabswid
0 .01472 m
1 .01472 L
s
.2619 .16863 m
.26815 .16863 L
s
[(50)] .2494 .16863 1 0 Mshowa
.2619 .32254 m
.26815 .32254 L
s
[(100)] .2494 .32254 1 0 Mshowa
.2619 .47645 m
.26815 .47645 L
s
[(150)] .2494 .47645 1 0 Mshowa
.125 Mabswid
.2619 .0455 m
.26565 .0455 L
s
.2619 .07628 m
.26565 .07628 L
s
.2619 .10706 m
.26565 .10706 L
s
.2619 .13784 m
.26565 .13784 L
s
.2619 .19941 m
.26565 .19941 L
s
.2619 .23019 m
.26565 .23019 L
s
.2619 .26097 m
.26565 .26097 L
s
.2619 .29175 m
.26565 .29175 L
s
.2619 .35332 m
.26565 .35332 L
s
.2619 .3841 m
.26565 .3841 L
s
.2619 .41488 m
.26565 .41488 L
s
.2619 .44566 m
.26565 .44566 L
s
.2619 .50723 m
.26565 .50723 L
s
.2619 .53801 m
.26565 .53801 L
s
.2619 .56879 m
.26565 .56879 L
s
.2619 .59957 m
.26565 .59957 L
s
.25 Mabswid
.2619 0 m
.2619 .61803 L
s
0 0 m
1 0 L
1 .61803 L
0 .61803 L
closepath
clip
newpath
.5 Mabswid
.02381 .0148 m
.03279 .01482 L
.04262 .01486 L
.05288 .0149 L
.06244 .01496 L
.0731 .01505 L
.0828 .01515 L
.094 .0153 L
.10458 .0155 L
.11428 .01574 L
.12455 .01607 L
.13333 .01643 L
.14299 .01693 L
.15313 .01761 L
.1624 .01841 L
.17311 .01959 L
.18328 .02103 L
.19287 .02275 L
.20309 .02507 L
.22147 .03087 L
.23176 .03529 L
.24289 .04127 L
.2525 .04767 L
.26306 .05617 L
.283 .07752 L
.30406 .10922 L
.32357 .14857 L
.34448 .20233 L
.38585 .33951 L
.42569 .48277 L
.44391 .53754 L
.45428 .56263 L
.46402 .58119 L
.46866 .58815 L
.47354 .5941 L
.47609 .59664 L
.47889 .59896 L
.48141 .60064 L
.48379 .60184 L
.48512 .60236 L
.48655 .60279 L
.48785 .60308 L
.48906 .60324 L
.49036 .60332 L
.4911 .60331 L
.49179 .60328 L
.49251 .6032 L
.49318 .60311 L
.49395 .60297 L
.49468 .60279 L
Mistroke
.49589 .60243 L
.49719 .60195 L
.49952 .60082 L
.50229 .59903 L
.5048 .597 L
.50969 .59196 L
.51485 .58513 L
.52409 .56925 L
.54492 .51857 L
.58294 .39382 L
.62342 .2575 L
.66238 .15456 L
.68366 .11365 L
.7038 .0842 L
.72374 .06257 L
.74218 .04801 L
.76088 .03738 L
.77152 .0328 L
.7815 .02929 L
.79135 .02645 L
.80172 .02402 L
.82024 .02081 L
.82981 .0196 L
.84002 .01855 L
.8584 .01719 L
.86866 .01664 L
.87978 .01618 L
.89028 .01584 L
.89995 .0156 L
.90902 .01542 L
.91875 .01527 L
.92942 .01514 L
.9394 .01504 L
.94844 .01497 L
.95829 .01492 L
.97619 .01484 L
Mfstroke
% End of Graphics
MathPictureEnd
\
\>"], "Graphics",
  ImageSize->{288, 177.938},
  ImageMargins->{{43, 0}, {0, 0}},
  ImageRegion->{{0, 1}, {0, 1}},
  ImageCacheValid->False],

Cell[BoxData[
    \({{mean \[Rule] 0.004879548601786564`}, {median \[Rule] 
          0.004856378845728973`}, {mode \[Rule] 
          0.004802361901494656`}, {lower \[Rule] 
          0.0007007654917407601`}, {upper \[Rule] 
          0.009226057592999205`}}\)], "Output"]
}, Open  ]],

Cell["\<\
Zero is not in the confidence interval, so we can reject the hypothesis that \
the measurement errors are the same. The one-sided p-value is\
\>", "Text"],

Cell[CellGroupData[{

Cell[BoxData[
    \(NIntegrate[diffInterp\[Sigma][d], {d, \(-0.005\), 0}]\)], "Input"],

Cell[BoxData[
    \(0.011715209494181944`\)], "Output"]
}, Open  ]],

Cell[TextData[{
  "xxxxxxxxxxxxxxxxxxxxxxxxxxxxxxxxxxxxxxxxxxxxxxxxxxxxxxxxxxxxxxxxxxxxxxxxxx\
\nThis saves the state of ",
  StyleBox["Mathematica",
    FontSlant->"Italic"],
  ", so you can avoid waiting 20 minutes while it recalculates. You can \
restore the state with the command\n",
  Cell[BoxData[
      \(<< "\<fish_mitochondria_analysis.mx\>"\)], "Input"]
}], "Text"],

Cell[BoxData[
    \(\(DumpSave["\<fish_mitchondria_analysis.mx\>"];\)\)], "Input"]
},
FrontEndVersion->"5.0 for Microsoft Windows",
ScreenRectangle->{{0, 1920}, {0, 995}},
Evaluator->"Local",
WindowSize->{890, 779},
WindowMargins->{{395, Automatic}, {Automatic, 30}},
PrintingCopies->1,
PrintingPageRange->{Automatic, Automatic}
]

(*******************************************************************
Cached data follows.  If you edit this Notebook file directly, not
using Mathematica, you must remove the line containing CacheID at
the top of  the file.  The cache data will then be recreated when
you save this file from within Mathematica.
*******************************************************************)

(*CellTagsOutline
CellTagsIndex->{}
*)

(*CellTagsIndex
CellTagsIndex->{}
*)

(*NotebookFileOutline
Notebook[{
Cell[1754, 51, 985, 20, 185, "Text"],
Cell[2742, 73, 945, 14, 170, "Input"],
Cell[3690, 89, 91, 2, 33, "Text"],
Cell[3784, 93, 79, 1, 30, "Input"],
Cell[3866, 96, 271, 5, 52, "Text"],
Cell[4140, 103, 6319, 88, 850, "Input"],
Cell[10462, 193, 259, 5, 52, "Text"],
Cell[10724, 200, 758, 17, 130, "Input"],
Cell[11485, 219, 75, 0, 33, "Text"],

Cell[CellGroupData[{
Cell[11585, 223, 81, 1, 30, "Input"],
Cell[11669, 226, 969, 14, 124, "Output"]
}, Open  ]],
Cell[12653, 243, 65, 0, 33, "Text"],
Cell[12721, 245, 153, 3, 30, "Input"],
Cell[12877, 250, 217, 4, 52, "Text"],
Cell[13097, 256, 223, 4, 52, "Text"],
Cell[13323, 262, 158, 2, 30, "Input"],
Cell[13484, 266, 320, 5, 52, "Text"],
Cell[13807, 273, 300, 6, 50, "Input"],
Cell[14110, 281, 299, 5, 52, "Text"],
Cell[14412, 288, 166, 3, 30, "Input"],
Cell[14581, 293, 167, 3, 33, "Text"],
Cell[14751, 298, 166, 3, 30, "Input"],
Cell[14920, 303, 162, 3, 33, "Text"],

Cell[CellGroupData[{
Cell[15107, 310, 126, 3, 30, "Input"],
Cell[15236, 315, 13662, 382, 186, 3627, 254, "GraphicsData", "PostScript", \
"Graphics"]
}, Open  ]],
Cell[28913, 700, 559, 10, 128, "Text"],
Cell[29475, 712, 1052, 19, 210, "Input"],
Cell[30530, 733, 183, 4, 33, "Text"],
Cell[30716, 739, 1269, 19, 150, "Input"],
Cell[31988, 760, 62, 0, 33, "Text"],

Cell[CellGroupData[{
Cell[32075, 764, 255, 5, 70, "Input"],

Cell[CellGroupData[{
Cell[32355, 773, 4987, 343, 186, 4864, 339, "GraphicsData", "PostScript", \
"Graphics",
  ImageCacheValid->False],
Cell[37345, 1118, 14209, 925, 186, 14086, 921, "GraphicsData", "PostScript", \
"Graphics",
  ImageCacheValid->False]
}, Open  ]]
}, Open  ]],
Cell[51581, 2047, 119, 3, 33, "Text"],

Cell[CellGroupData[{
Cell[51725, 2054, 336, 6, 50, "Input"],
Cell[52064, 2062, 18957, 1159, 186, 18834, 1155, "GraphicsData", \
"PostScript", "Graphics",
  ImageCacheValid->False]
}, Open  ]],
Cell[71036, 3224, 105, 3, 33, "Text"],
Cell[71144, 3229, 196, 4, 52, "Text"],
Cell[71343, 3235, 1425, 26, 270, "Input"],
Cell[72771, 3263, 93, 2, 33, "Text"],

Cell[CellGroupData[{
Cell[72889, 3269, 172, 3, 70, "Input"],
Cell[73064, 3274, 269, 5, 29, "Output"],
Cell[73336, 3281, 271, 5, 29, "Output"],
Cell[73610, 3288, 271, 5, 29, "Output"]
}, Open  ]],
Cell[73896, 3296, 2916, 82, 375, "Text"],
Cell[76815, 3380, 206, 4, 52, "Text"],
Cell[77024, 3386, 800, 14, 250, "Input"],
Cell[77827, 3402, 104, 3, 33, "Text"],
Cell[77934, 3407, 361, 6, 50, "Input"],
Cell[78298, 3415, 70, 0, 33, "Text"],
Cell[78371, 3417, 170, 3, 30, "Input"],
Cell[78544, 3422, 199, 4, 52, "Text"],

Cell[CellGroupData[{
Cell[78768, 3430, 200, 3, 50, "Input"],
Cell[78971, 3435, 4757, 349, 186, 4634, 345, "GraphicsData", "PostScript", \
"Graphics",
  ImageCacheValid->False]
}, Open  ]],
Cell[83743, 3787, 99, 2, 33, "Text"],

Cell[CellGroupData[{
Cell[83867, 3793, 140, 2, 30, "Input"],
Cell[84010, 3797, 4521, 334, 186, 4398, 330, "GraphicsData", "PostScript", \
"Graphics",
  ImageCacheValid->False]
}, Open  ]],
Cell[88546, 4134, 1156, 31, 166, "Text"],
Cell[89705, 4167, 468, 8, 70, "Input"],
Cell[90176, 4177, 104, 3, 33, "Text"],
Cell[90283, 4182, 516, 8, 130, "Input"],
Cell[90802, 4192, 191, 4, 52, "Text"],

Cell[CellGroupData[{
Cell[91018, 4200, 164, 3, 30, "Input"],
Cell[91185, 4205, 58, 1, 29, "Output"]
}, Open  ]],
Cell[91258, 4209, 53, 0, 33, "Text"],

Cell[CellGroupData[{
Cell[91336, 4213, 164, 3, 30, "Input"],
Cell[91503, 4218, 69, 1, 29, "Output"]
}, Open  ]],
Cell[91587, 4222, 162, 3, 33, "Text"],
Cell[91752, 4227, 222, 4, 50, "Input"],

Cell[CellGroupData[{
Cell[91999, 4235, 122, 2, 30, "Input"],
Cell[92124, 4239, 520, 8, 52, "Message"],
Cell[92647, 4249, 520, 8, 52, "Message"],
Cell[93170, 4259, 520, 8, 52, "Message"],
Cell[93693, 4269, 336, 5, 22, "Message"],
Cell[94032, 4276, 6402, 422, 186, 6279, 418, "GraphicsData", "PostScript", \
"Graphics",
  ImageCacheValid->False],
Cell[100437, 4700, 130, 3, 29, "Output"]
}, Open  ]],
Cell[100582, 4706, 294, 7, 52, "Text"],
Cell[100879, 4715, 583, 11, 170, "Input"],

Cell[CellGroupData[{
Cell[101487, 4730, 172, 3, 50, "Input"],
Cell[101662, 4735, 520, 8, 52, "Message"],
Cell[102185, 4745, 520, 8, 52, "Message"],
Cell[102708, 4755, 520, 8, 52, "Message"],
Cell[103231, 4765, 336, 5, 22, "Message"],
Cell[103570, 4772, 437, 6, 37, "Message"],
Cell[104010, 4780, 520, 8, 52, "Message"],
Cell[104533, 4790, 520, 8, 52, "Message"],
Cell[105056, 4800, 520, 8, 52, "Message"],
Cell[105579, 4810, 336, 5, 22, "Message"]
}, Open  ]],
Cell[105930, 4818, 105, 3, 33, "Text"],

Cell[CellGroupData[{
Cell[106060, 4825, 261, 5, 90, "Input"],
Cell[106324, 4832, 7345, 494, 186, 7222, 490, "GraphicsData", "PostScript", \
"Graphics",
  ImageCacheValid->False],
Cell[113672, 5328, 258, 5, 29, "Output"],
Cell[113933, 5335, 258, 5, 29, "Output"]
}, Open  ]],
Cell[114206, 5343, 429, 8, 71, "Text"],
Cell[114638, 5353, 568, 9, 90, "Input"],

Cell[CellGroupData[{
Cell[115231, 5366, 149, 3, 30, "Input"],
Cell[115383, 5371, 4117, 281, 186, 3994, 277, "GraphicsData", "PostScript", \
"Graphics",
  ImageCacheValid->False]
}, Open  ]],
Cell[119515, 5655, 52, 0, 33, "Text"],

Cell[CellGroupData[{
Cell[119592, 5659, 257, 6, 50, "Input"],
Cell[119852, 5667, 243, 4, 29, "Output"]
}, Open  ]],
Cell[120110, 5674, 162, 3, 33, "Text"],

Cell[CellGroupData[{
Cell[120297, 5681, 76, 1, 30, "Input"],
Cell[120376, 5684, 53, 1, 29, "Output"]
}, Open  ]],
Cell[120444, 5688, 177, 4, 33, "Text"],

Cell[CellGroupData[{
Cell[120646, 5696, 408, 10, 90, "Input"],
Cell[121057, 5708, 520, 8, 52, "Message"],
Cell[121580, 5718, 399, 6, 37, "Message"],
Cell[121982, 5726, 520, 8, 52, "Message"],
Cell[122505, 5736, 391, 6, 37, "Message"],
Cell[122899, 5744, 392, 6, 37, "Message"],
Cell[123294, 5752, 334, 5, 22, "Message"],
Cell[123631, 5759, 520, 8, 52, "Message"],
Cell[124154, 5769, 336, 5, 22, "Message"],
Cell[124493, 5776, 4068, 280, 186, 3945, 276, "GraphicsData", "PostScript", \
"Graphics",
  ImageCacheValid->False],
Cell[128564, 6058, 273, 5, 29, "Output"]
}, Open  ]],
Cell[128852, 6066, 164, 3, 33, "Text"],

Cell[CellGroupData[{
Cell[129041, 6073, 86, 1, 30, "Input"],
Cell[129130, 6076, 55, 1, 29, "Output"]
}, Open  ]],
Cell[129200, 6080, 376, 9, 68, "Text"],
Cell[129579, 6091, 82, 1, 30, "Input"]
}
]
*)


(*******************************************************************
End of Mathematica Notebook file.
*******************************************************************)
